# Supplementary material for: Revisiting the potential-energy surface of CnBe3n+2H2n+22+ (n = 2–4) clusters: are planar pentacoordinate carbon structures the global minima?
Source: Royal Society of Chemistry journal article supplement (doi:10.1039/d3cp02056h), 2023-01-01
Supplement: d3cp02056h4.pdf [file d3cp02056h4.pdf]

**Supplementary Information of**  
**Revisiting the Potential Energy Surface of  $C_nBe_{3n+2}H_{2n+2}^{2+}$  ( $n=2-$**   
**4) Clusters: Are Planar Pentacoordinate Carbon Structures the**  
**Global Minima?**

Diego Inostroza,<sup>1,5</sup> Alejandro Vásquez-Espinal,<sup>2</sup> Luis Leyva-Parra,<sup>1,5</sup> Williams García-Argote,<sup>1,5</sup> María Luisa Ceron,<sup>3</sup> Osvaldo Yañez<sup>4</sup> and William Tiznado<sup>5,\*</sup>

<sup>1</sup> *Doctorado en Fisicoquímica Molecular, Facultad de Ciencias Exactas, Universidad Andres Bello, República 275, Santiago, Chile.*

<sup>2</sup> *Química y Farmacia, Facultad de Ciencias de la Salud, Universidad Arturo Prat, Casilla 121, Iquique 1100000, Chile*

<sup>3</sup> *Facultad de Ingeniería, Universidad Finis Terrae, Av. Pedro de Valdivia 1509, Providencia, Santiago, Chile*

<sup>4</sup> *Núcleo de Investigación en Data Science, Facultad de Ingeniería y Negocios, Universidad de las Américas, Santiago 7500000, Chile*

<sup>5</sup> *Computational and Theoretical Chemistry Group, Departamento de Ciencias Químicas, Facultad de Ciencias Exactas, Universidad Andrés Bello, Avenida República 275, Santiago de Chile 8370146, Chile*

\* Correspondence: wtiznado@unab.cl (W.T.)

**Figure S1.** The employed methodology involved permutation; we have used as molecular templates the acenes  $C_{4n+2}H_{2n+4}$  ( $n=2-4$ ). Carbon atoms were introduced to the center of each ring, whereas the perimeter of carbon was replaced by beryllium. Additionally, Be-H fragments were eliminated from each ring until the targeted stoichiometry was achieved.

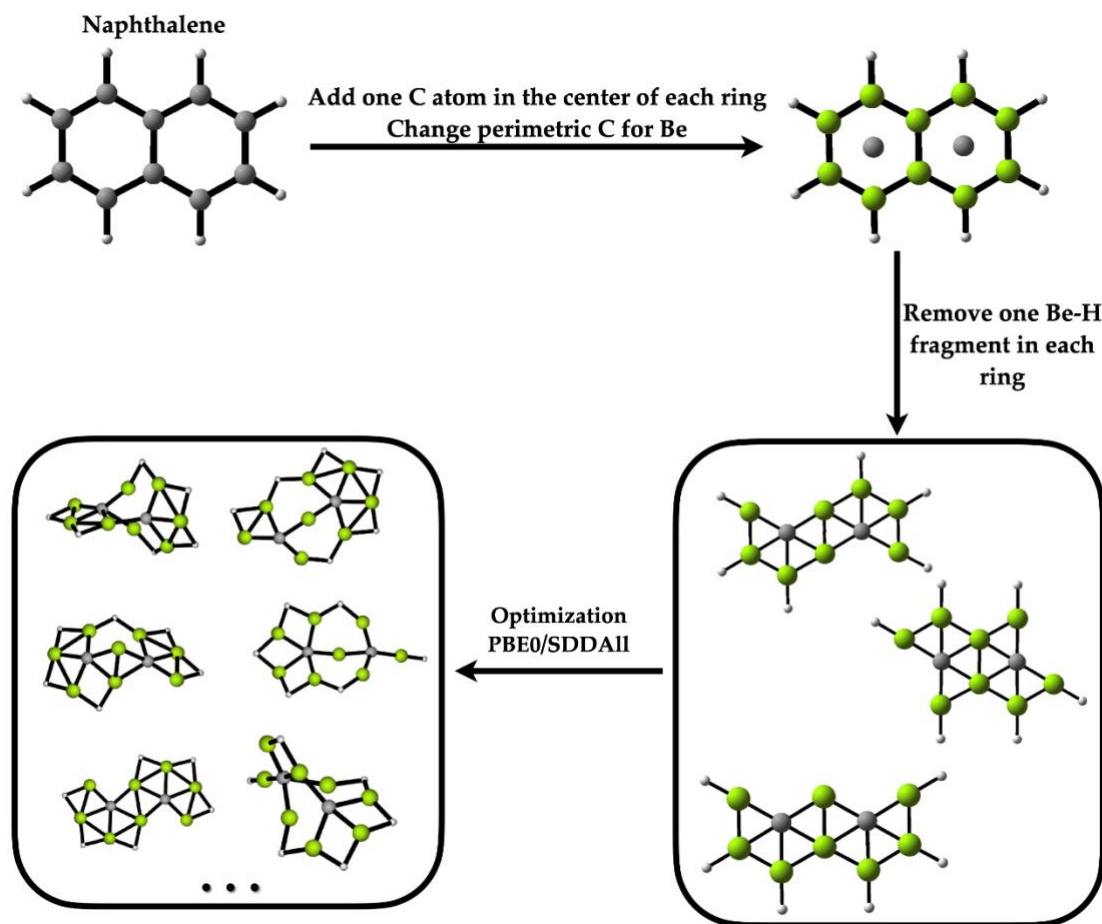

**Figures S2.** Minimum energy isomers of  $\text{CBe}_5\text{H}_4^+$  and their respective point group symmetries and spectroscopic states. Relative energies are shown in  $\text{kcal}\cdot\text{mol}^{-1}$  at PBE0-D3/def2-TZVP levels, including zero-point energy (ZPE) corrections. Within the brackets the methodology by which it was identified; (i) standard AUTOMATON; (ii) guided AUTOMATON, (iii) Fragment Kick, (iv) Permutation, and (v) exposed in BOMD; a special tag (ref) identifies the isomer discussed in the main text. To facilitate the connection of the structures with their Cartesian coordinates (at end of the ESI), a number-letter label was assigned to each structure.

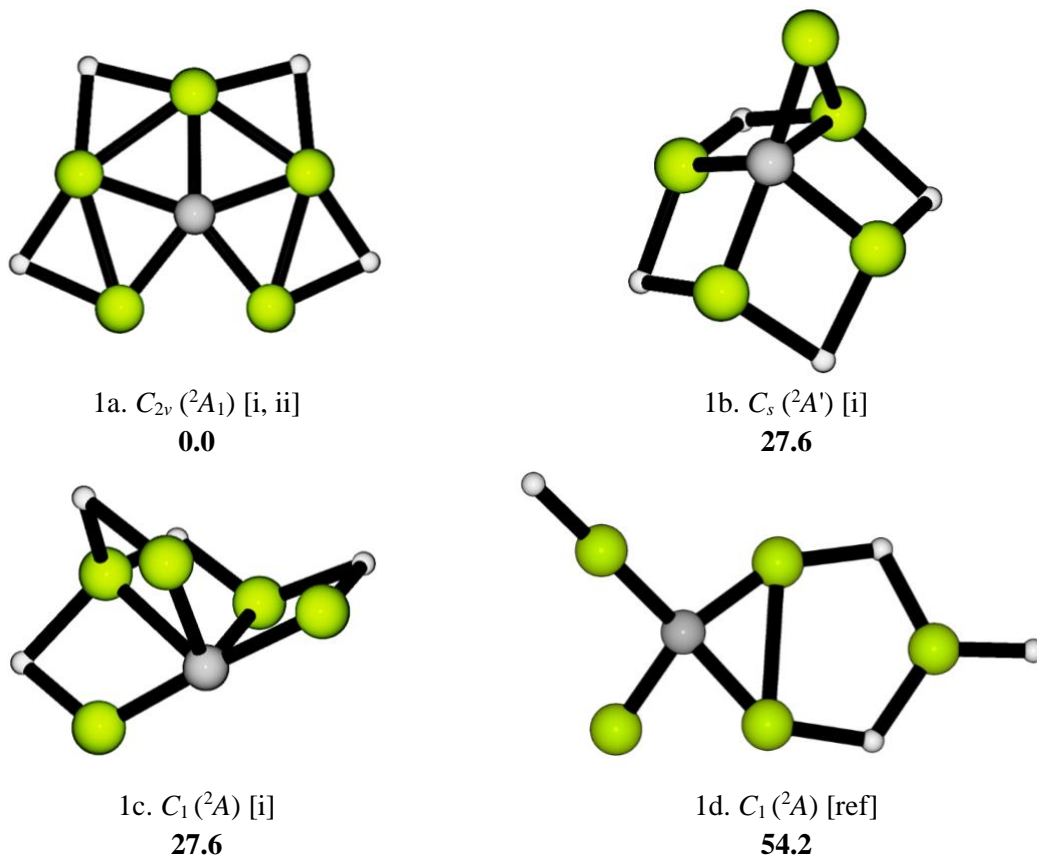

**Figures S3.** Minimum energy isomers of  $C_2Be_8H_6^{2+}$  and their respective point group symmetries and spectroscopic states. Relative energies are shown in kcal·mol<sup>-1</sup> at led as DLPNO-CCSD(T)/CBS (in **black**) and PBE0-D3/def2-TZVP (in parentheses) levels including zero-point energy (ZPE) corrections. Within the brackets the methodology by which it was identified; (i) standard AUTOMATON; (ii) guided AUTOMATON, (iii) Fragment Kick, (iv) Permutation, and (v) exposed in BOMD. To facilitate the connection of the structures with their Cartesian coordinates (at end of the ESI), a number-letter label was assigned to each structure.

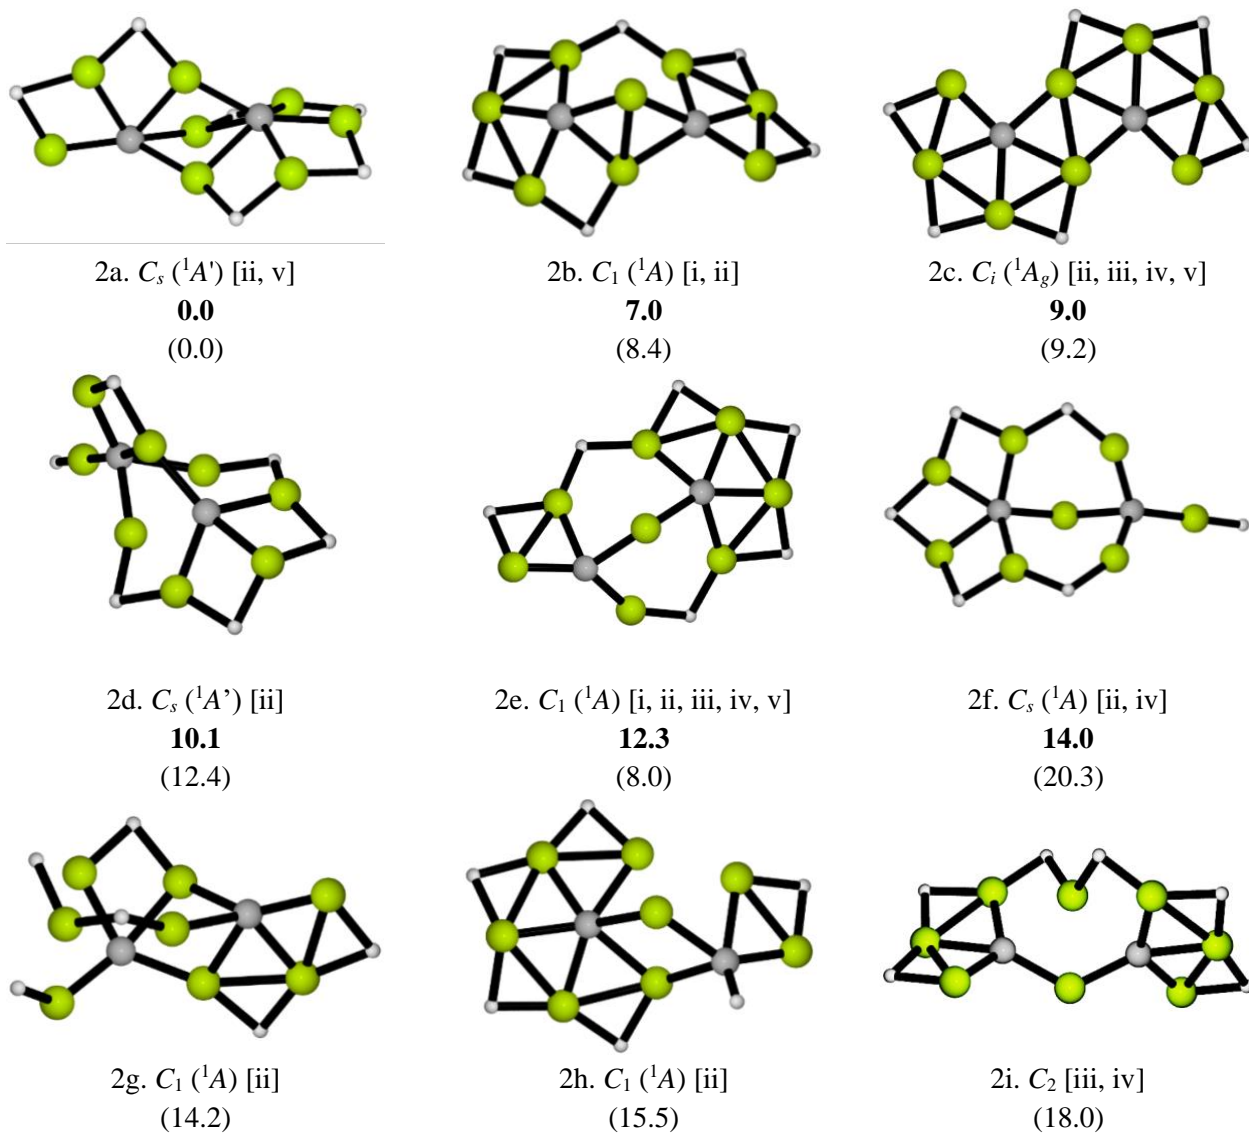

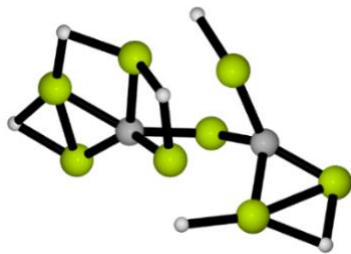

2j.  $C_1 (^1A)$  [i]  
(18.9)

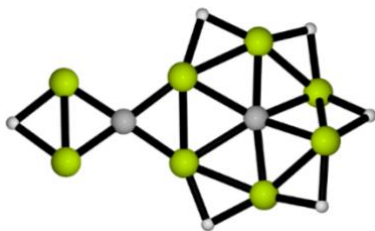

2k.  $C_1 (^1A)$  [iv]  
(19.5)

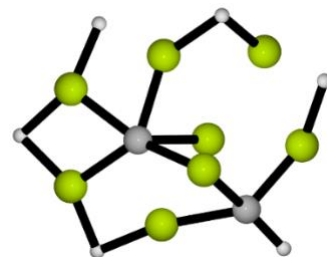

2l.  $C_1 (^1A)$  [iii]  
(20.1)

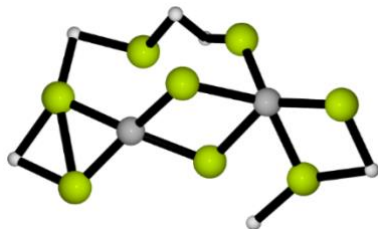

2m.  $C_1 (^1A)$  [i, ii]  
(20.2)

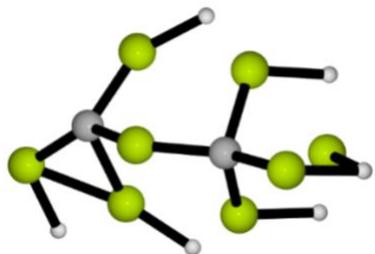

2n.  $C_1 (^1A)$  [ii]  
(20.4)

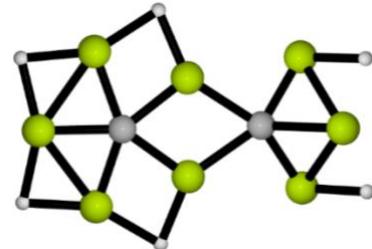

2o.  $C_s (^1A')$  [ii, iv]  
(21.1)

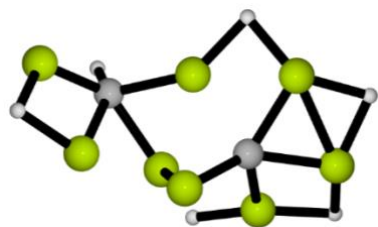

2p.  $C_1 (^1A)$  [iii]  
(21.5)

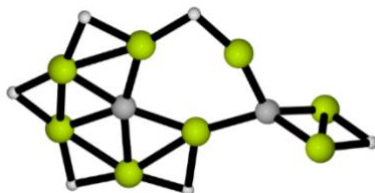

2q.  $C_1 (^1A)$  [ii]  
(21.8)

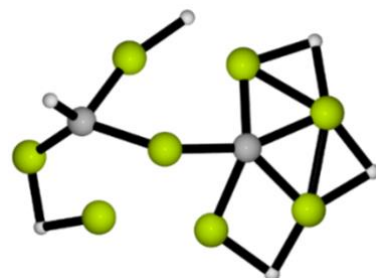

2r.  $C_1 (^1A)$  [ii, iii]  
(22.3)

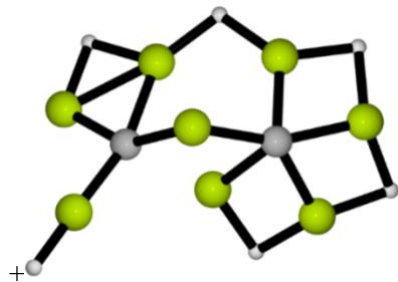

2s.  $C_1 (^1A)$  [iv]  
(22.5)

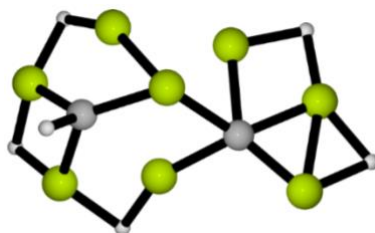

2t.  $C_1 (^1A)$  [iii]  
(23.0)

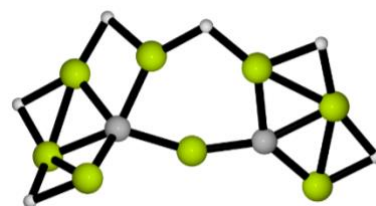

2u.  $C_1 (^1A)$  [ii, iii, iv]  
(23.1)

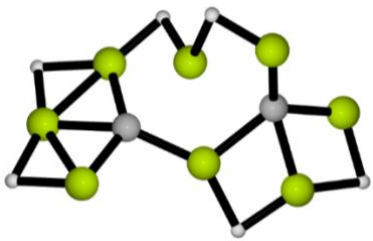

2v.  $C_1$  ( $^1A$ ) [ii, iii]  
(23.4)

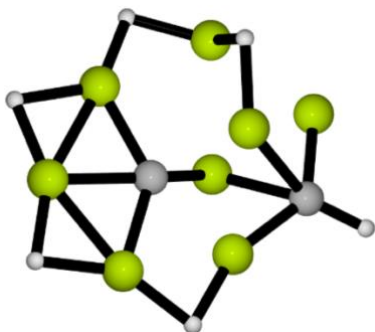

2w.  $C_1$  ( $^1A$ ) [ii]  
(24.9)

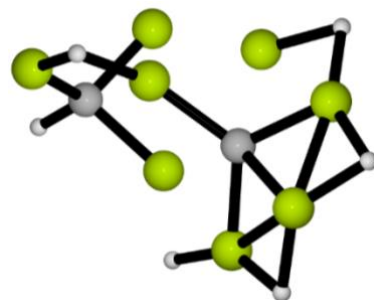

2x.  $C_1$  ( $^1A$ ) [ii]  
(25.9)

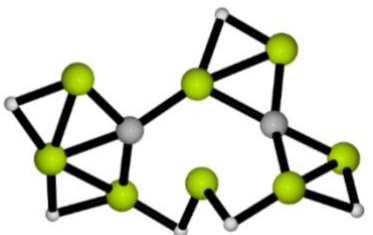

2y.  $C_1$  ( $^1A$ ) [iv]  
(26.4)

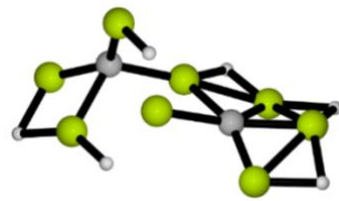

2z.  $C_1$  ( $^1A$ ) [ii]  
(27.2)

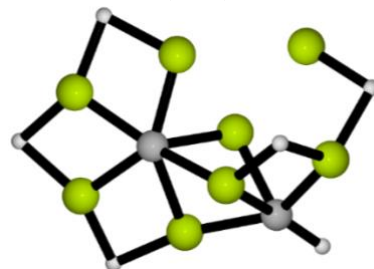

2ab.  $C_1$  ( $^1A$ ) [i]  
(27.4)

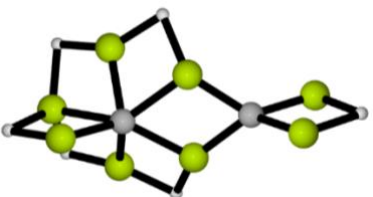

2ac.  $C_1$  ( $^1A$ ) [ii]  
(28.0)

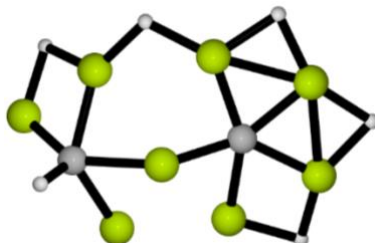

2ad.  $C_1$  ( $^1A$ ) [ii]  
(28.8)

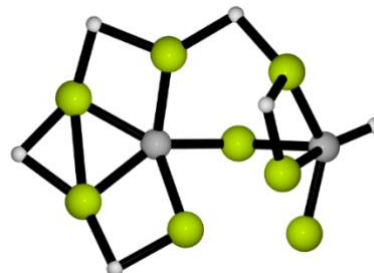

2ae.  $C_1$  ( $^1A$ ) [iii]  
(29.2)

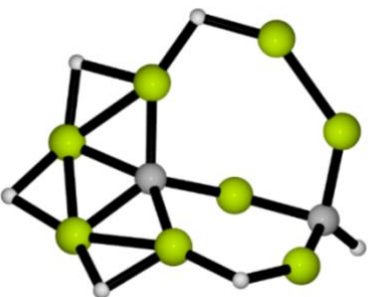

2af.  $C_1$  ( $^1A$ ) [ii]  
(30.6)

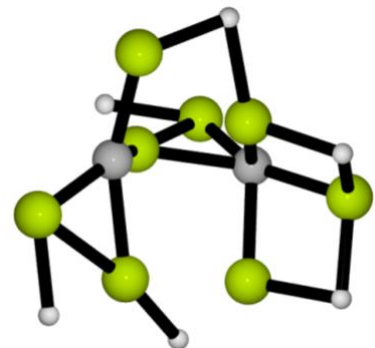

2ag.  $C_1$  ( $^1A$ ) [ii]  
(30.8)

**Figures S4.** Minimum energy isomers of  $C_3Be_{11}H_8^{2+}$  and their respective point group symmetries and spectroscopic states. Relative energies are shown in kcal·mol<sup>-1</sup> at PBE0-D3/def2-TZVP levels including zero-point energy (ZPE) corrections. Within the brackets the methodology by which it was identified; (i) standard AUTOMATON; (ii) guided AUTOMATON, (iii) Fragment Kick, (iv) Permutation, and (v) exposed in BOMD. To facilitate the connection of the structures with their Cartesian coordinates (at end of the ESI), a number-letter label was assigned to each structure.

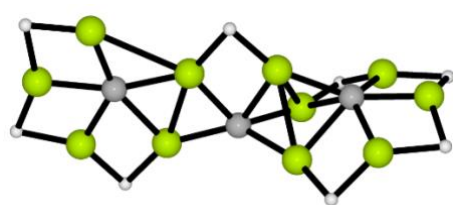

3a.  $C_s (^1A')$  [iv]  
0.0

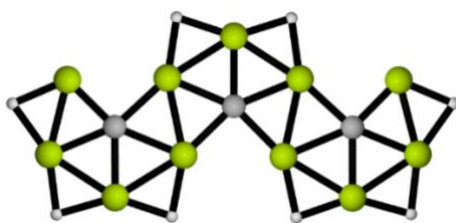

3b.  $C_{2v} (^1A_1)$  [iv, v]  
11.8

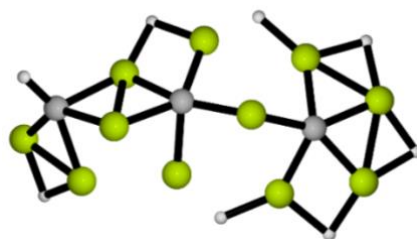

3c.  $C_1 (^1A)$  [iv]  
13.8

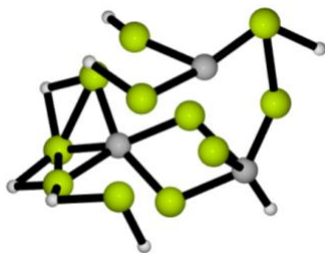

3d.  $C_1 (^1A)$  [ii]  
20.1

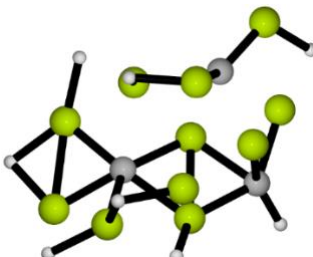

3e.  $C_1 (^1A)$  [ii]  
20.1

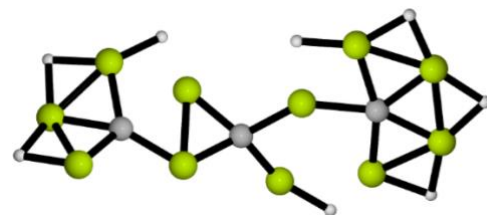

3f.  $C_1 (^1A)$  [iv]  
21.1

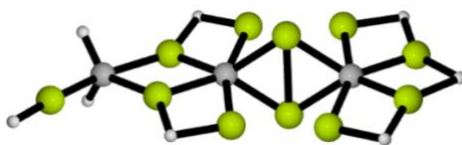

3g.  $C_1 (^1A)$  [iv]  
22.2

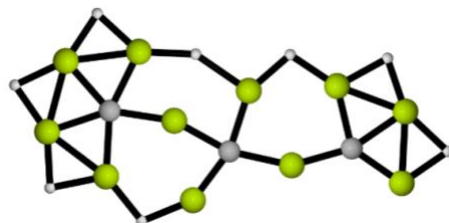

3h.  $C_s (^1A)$  [iv]  
22.5

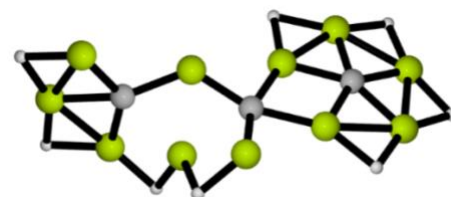

3i.  $C_1 (^1A)$  [iv]  
22.9

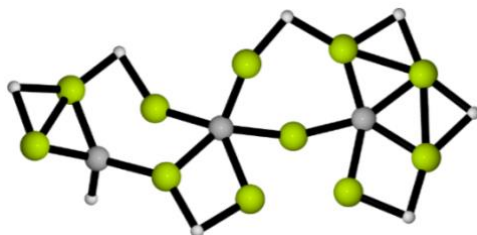

3j.  $C_1 (^1A)$  [iv]  
23.4

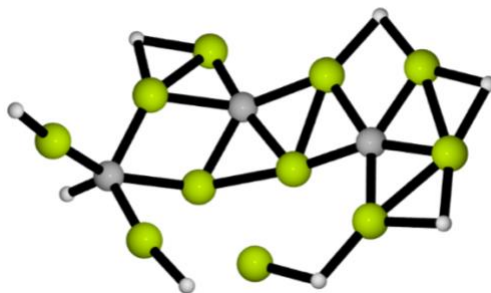

3k.  $C_1 (^1A)$  [iv]  
26.6

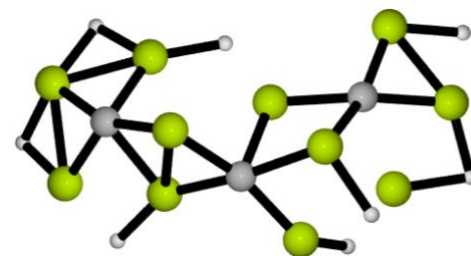

3l.  $C_1 (^1A)$  [ii]  
26.9

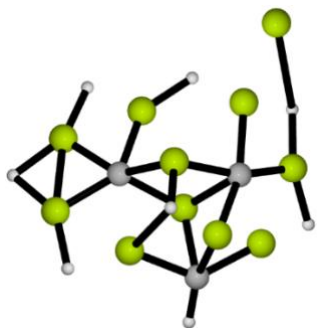

3m. C<sub>1</sub> (<sup>1</sup>A) [i]  
27.6

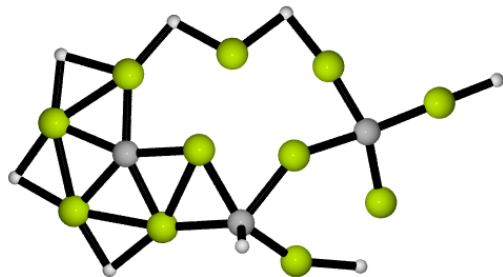

3n. C<sub>1</sub> (<sup>1</sup>A) [ii]  
28.6



**Figures S5.** Minimum energy isomers of  $C_4Be_{14}H_{10}^{2+}$  and their respective point group symmetries and spectroscopic states. Relative energies are shown in kcal·mol<sup>-1</sup> at led as DLPNO-CCSD(T)/CBS (in **black**) and PBE0-D3/def2-TZVP (in parentheses) levels including zero-point energy (ZPE) corrections. Within the brackets the methodology by which it was identified; (i) standard AUTOMATON; (ii) guided AUTOMATON, (iii) Fragment Kick, (iv) Permutation, and (v) exposed in BOMD. To facilitate the connection of the structures with their Cartesian coordinates (at end of the ESI), a number-letter label was assigned to each structure.

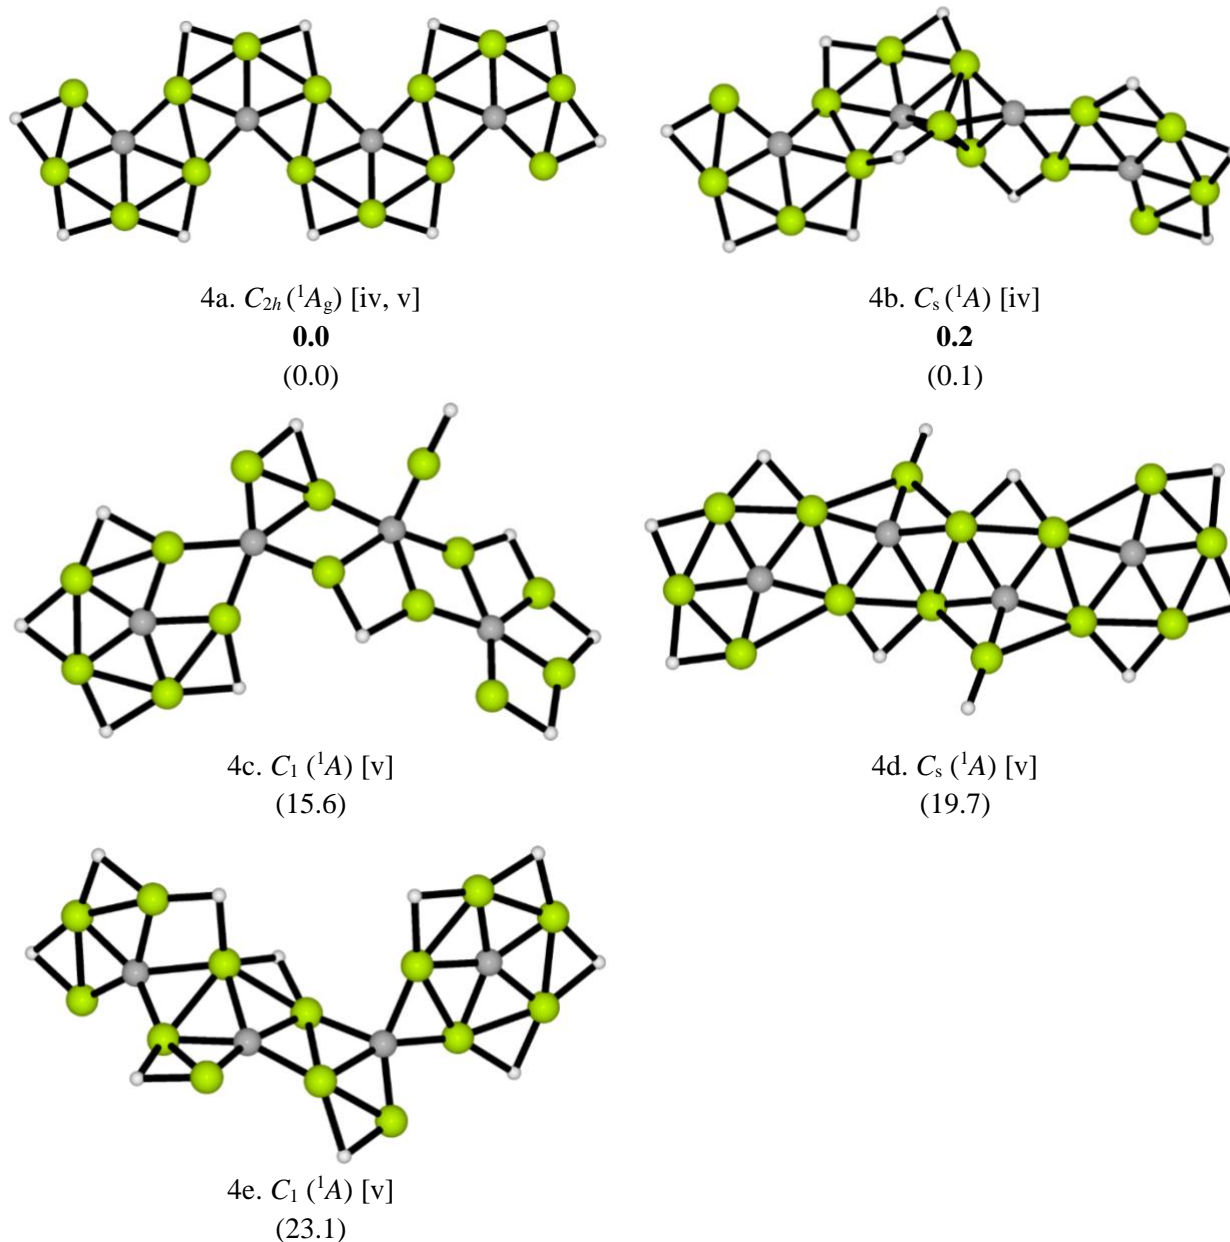

**Table S1.** HOMO-LUMO energy gaps and smallest vibrational frequencies for the  $\text{CBe}_5\text{H}_4^+$  clusters.

| System | $\Delta E_{\text{H-L}}$ (eV) | $\nu_{\text{min}}$ ( $\text{cm}^{-1}$ ) |
|--------|------------------------------|-----------------------------------------|
| 1a     | 4.28                         | 118.0                                   |
| 1b     | 3.24                         | 189.9                                   |
| 1c     | 3.07                         | 221.9                                   |
| 1d     | 3.08                         | 23.7                                    |

**Table S2.** HOMO-LUMO energy gaps and smallest vibrational frequencies for the  $\text{C}_2\text{Be}_8\text{H}_6^{2+}$  clusters.

| System | $\Delta E_{\text{H-L}}$ (eV) | $\nu_{\text{min}}$ ( $\text{cm}^{-1}$ ) |
|--------|------------------------------|-----------------------------------------|
| 2a     | 5.58                         | 79.0                                    |
| 2b     | 5.07                         | 75.6                                    |
| 2c     | 4.85                         | 30.6                                    |
| 2d     | 5.08                         | 64.2                                    |
| 2e     | 5.19                         | 98.9                                    |
| 2f     | 4.60                         | 108.5                                   |
| 2g     | 5.14                         | 93.3                                    |
| 2h     | 4.32                         | 68.3                                    |
| 2i     | 5.08                         | 62.8                                    |
| 2j     | 5.42                         | 92.9                                    |
| 2k     | 4.91                         | 28.1                                    |
| 2l     | 4.25                         | 145.5                                   |
| 2m     | 5.40                         | 72.8                                    |
| 2n     | 5.19                         | 115.5                                   |
| 2o     | 4.20                         | 65.4                                    |
| 2p     | 4.25                         | 102.1                                   |
| 2q     | 4.77                         | 40.5                                    |
| 2r     | 3.92                         | 88.0                                    |

| System | $\Delta E_{H-L}$ (eV) | $\nu_{\min}$ (cm <sup>-1</sup> ) |
|--------|-----------------------|----------------------------------|
| 2s     | 4.97                  | 45.0                             |
| 2t     | 3.90                  | 65.7                             |
| 2u     | 3.93                  | 47.4                             |
| 2v     | 4.98                  | 75.3                             |
| 2w     | 4.35                  | 94.1                             |
| 2x     | 3.77                  | 72.7                             |
| 2y     | 4.58                  | 27.4                             |
| 2z     | 5.14                  | 53.7                             |
| 2ab    | 4.29                  | 136.1                            |
| 2ac    | 5.07                  | 35.9                             |
| 2ad    | 3.57                  | 81.4                             |
| 2ae    | 3.85                  | 75.0                             |
| 2af    | 4.42                  | 70.2                             |
| 2ag    | 4.92                  | 98.7                             |

**Table S3.** HOMO-LUMO energy gaps and smallest vibrational frequencies for the C<sub>3</sub>Be<sub>11</sub>H<sub>8</sub><sup>2+</sup> clusters.

| System | $\Delta E_{H-L}$ (eV) | $\nu_{\min}$ (cm <sup>-1</sup> ) |
|--------|-----------------------|----------------------------------|
| 3a     | 4.84                  | 27.2                             |
| 3b     | 3.96                  | 39.3                             |
| 3c     | 3.93                  | 72.3                             |
| 3d     | 4.65                  | 107.0                            |
| 3e     | 4.67                  | 123.7                            |
| 3f     | 4.15                  | 20.0                             |
| 3g     | 3.57                  | 47.6                             |
| 3h     | 4.13                  | 29.8                             |
| 3i     | 3.91                  | 40.1                             |
| 3j     | 3.37                  | 47.8                             |

| <b>System</b> | $\Delta E_{\text{H-L}}$ (eV) | $\nu_{\text{min}}$ (cm <sup>-1</sup> ) |
|---------------|------------------------------|----------------------------------------|
| <b>3k</b>     | 3.88                         | 48.3                                   |
| <b>3l</b>     | 4.48                         | 59.8                                   |
| <b>3m</b>     | 4.47                         | 73.0                                   |
| <b>3n</b>     | 4.01                         | 42.2                                   |

**Table S4.** HOMO-LUMO energy gaps and smallest vibrational frequencies for the C<sub>4</sub>Be<sub>14</sub>H<sub>10</sub><sup>2+</sup> clusters.

| <b>System</b> | $\Delta E_{\text{H-L}}$ (eV) | $\nu_{\text{min}}$ (cm <sup>-1</sup> ) |
|---------------|------------------------------|----------------------------------------|
| <b>4a</b>     | 3.51                         | 20.4                                   |
| <b>4b</b>     | 4.33                         | 30.5                                   |
| <b>4c</b>     | 4.01                         | 26.2                                   |
| <b>4d</b>     | 4.30                         | 34.2                                   |
| <b>4e</b>     | 3.83                         | 21.5                                   |

**Table S5.** Cartesian coordinates of the C-Be-H systems with their label for easier identification.

| 1a |              |              |              | 1b |              |              |              |
|----|--------------|--------------|--------------|----|--------------|--------------|--------------|
| 4  | 0.000000000  | 1.584622020  | 0.487687327  | 4  | 1.791115739  | 0.639797350  | 0.000000000  |
| 1  | 0.000000000  | -2.405445048 | -0.746925189 | 1  | -1.888753235 | 0.032898858  | 1.257848873  |
| 6  | 0.000000000  | 0.000000000  | -0.073811162 | 1  | 0.069087520  | -1.649197573 | 1.300620762  |
| 4  | 0.000000000  | -1.584622020 | 0.487687327  | 1  | -1.888753235 | 0.032898858  | -1.257848873 |
| 1  | 0.000000000  | 2.405445048  | -0.746925189 | 1  | 0.069087520  | -1.649197573 | -1.300620762 |
| 4  | 0.000000000  | -1.042691023 | -1.380600180 | 4  | -1.468160280 | 0.709531154  | 0.000000000  |
| 4  | 0.000000000  | 0.000000000  | 1.609784888  | 4  | 0.694912580  | -1.194511338 | 0.000000000  |
| 4  | 0.000000000  | 1.042691023  | -1.380600180 | 4  | -0.441349775 | -0.270691383 | 1.346236490  |
| 1  | 0.000000000  | -1.444599522 | 1.973450370  | 4  | -0.441349775 | -0.270691383 | -1.346236490 |
| 1  | 0.000000000  | 1.444599522  | 1.973450370  | 6  | 0.204137203  | 0.561807606  | 0.000000000  |
| 1c |              |              |              | 1d |              |              |              |
| 4  | 1.728628000  | 0.411544000  | 0.237887000  | 4  | -1.391565000 | 1.528201000  | 0.379371000  |
| 1  | -2.276753000 | -0.402166000 | 0.111160000  | 4  | -2.051659000 | -0.869559000 | -0.276684000 |
| 4  | 0.101148000  | 1.266255000  | -0.750797000 | 4  | 0.509076000  | 1.076508000  | -0.304817000 |
| 4  | 0.680799000  | -1.214301000 | -0.009329000 | 4  | 0.385147000  | -0.999528000 | 0.422245000  |
| 6  | 0.128388000  | 0.273310000  | 0.623305000  | 1  | -3.108027000 | -1.622318000 | -0.535000000 |
| 1  | -0.846865000 | 0.728950000  | -1.737324000 | 1  | 1.910314000  | 1.070656000  | -0.394725000 |
| 1  | 2.122745000  | -0.954499000 | -0.226432000 | 4  | 2.570829000  | -0.230602000 | -0.085017000 |
| 4  | -1.005375000 | -0.414596000 | -0.763461000 | 1  | 3.873877000  | -0.419735000 | -0.208021000 |
| 4  | -1.382718000 | 0.129301000  | 1.086154000  | 1  | 1.719905000  | -1.386832000 | 0.412273000  |
| 1  | -0.280161000 | -1.721245000 | -0.998863000 | 6  | -0.753662000 | 0.076531000  | 0.107556000  |
| 2a |              |              |              | 2b |              |              |              |
| 1  | 3.239027000  | 1.165533000  | 0.396601000  | 1  | 2.318969000  | 1.854761000  | -0.868619000 |
| 1  | -1.523789000 | -0.808461000 | 2.019735000  | 1  | -2.681134000 | 1.736436000  | -0.372279000 |
| 1  | 0.766861000  | 2.392432000  | -0.005325000 | 4  | 2.768730000  | 0.526779000  | -0.519730000 |
| 4  | -2.448986000 | -0.390091000 | 0.961638000  | 4  | -2.906990000 | 0.311045000  | -0.042708000 |
| 4  | 1.786215000  | 1.424942000  | 0.405524000  | 1  | 3.827254000  | -0.561610000 | -0.417017000 |
| 1  | -3.854017000 | -0.193290000 | 0.406484000  | 1  | -3.329635000 | -0.782831000 | -0.943393000 |
| 4  | 2.803803000  | -0.240682000 | 0.316800000  | 4  | 1.022203000  | 1.364410000  | -0.276901000 |
| 4  | -3.071690000 | 0.314018000  | -0.716753000 | 4  | -2.056328000 | -1.367585000 | -0.499977000 |
| 4  | -0.069657000 | 1.184584000  | -0.241474000 | 1  | -0.130758000 | 2.241988000  | -0.248561000 |
| 6  | -1.488099000 | 0.193500000  | -0.365522000 | 1  | -0.878096000 | -1.950573000 | -1.213042000 |
| 1  | 3.136391000  | -1.380048000 | -0.556408000 | 4  | 2.718958000  | -1.206780000 | 0.264679000  |
| 4  | -0.507985000 | -0.366536000 | 1.023678000  | 6  | -1.385647000 | -0.196548000 | 0.540818000  |
| 6  | 1.073831000  | -0.152391000 | 0.268940000  | 6  | 1.404495000  | -0.247164000 | 0.240518000  |
| 4  | 1.667929000  | -1.477567000 | -0.678942000 | 4  | -0.123882000 | -0.952393000 | -0.435430000 |
| 4  | -0.147221000 | -0.742638000 | -0.959609000 | 4  | -1.305051000 | 1.426203000  | 0.066188000  |
| 1  | 0.597960000  | -1.857132000 | -1.604951000 | 4  | 0.072437000  | -0.070653000 | 1.287602000  |
| 2c |              |              |              | 2d |              |              |              |
| 1  | -3.748396364 | -1.205183691 | 0.039912248  | 1  | -1.275900000 | 1.252506000  | 2.185535000  |
| 1  | 3.748396364  | 1.205183691  | -0.039912248 | 1  | 0.494065000  | -2.424993000 | 0.321822000  |
| 4  | -3.145801395 | 0.155229565  | 0.281368630  | 4  | -2.263383000 | 0.773944000  | 1.239592000  |
| 4  | 3.145801395  | -0.155229565 | -0.281368630 | 1  | 0.545405000  | 1.652710000  | -1.712475000 |
| 1  | -3.329982942 | 1.592111496  | 0.111299619  | 1  | 3.133071000  | 0.978650000  | -0.935506000 |
| 1  | 3.329982942  | -1.592111496 | -0.111299619 | 4  | -2.852778000 | -0.557448000 | -0.937738000 |
| 4  | -2.355117902 | -1.462804532 | -0.231839633 | 4  | -0.353014000 | 0.573153000  | 1.177433000  |
| 4  | 2.355117902  | 1.462804532  | 0.231839633  | 4  | 1.648218000  | -1.538984000 | 0.483946000  |
| 6  | -1.457718425 | -0.130214933 | -0.030893814 | 4  | 2.807527000  | -0.019769000 | 0.093288000  |
| 4  | 1.896106161  | -1.530209822 | 0.167581348  | 4  | -0.250977000 | -1.162779000 | 0.097162000  |
| 4  | -1.896106161 | 1.530209822  | -0.167581348 | 6  | -1.563133000 | -0.013766000 | 0.003821000  |
| 6  | 1.457718425  | 0.130214933  | 0.030893814  | 4  | -0.220906000 | 0.702346000  | -0.872532000 |
| 4  | 0.050136594  | -0.957640601 | 0.099964867  | 4  | 1.683615000  | 1.244035000  | -0.883690000 |
| 1  | 0.667187507  | -2.310023659 | 0.195261039  | 1  | 3.099516000  | -1.454281000 | 0.251844000  |
| 1  | -0.667187507 | 2.310023659  | -0.195261039 | 6  | 1.074398000  | 0.090397000  | 0.268627000  |
| 4  | -0.050136594 | 0.957640601  | -0.099964867 | 1  | -3.854047000 | -0.982647000 | -1.681509000 |

|    |              |              |              |    |              |              |              |
|----|--------------|--------------|--------------|----|--------------|--------------|--------------|
| 2e |              |              |              | 2f |              |              |              |
| 1  | -3.677662000 | -0.478597000 | 0.024265000  | 4  | 1.509550000  | 1.392702000  | -0.680712000 |
| 1  | 3.282372000  | -1.526941000 | -0.295690000 | 4  | 3.482662000  | 0.038441000  | 0.609624000  |
| 1  | -2.501108000 | 1.972438000  | -0.368230000 | 4  | 1.493258000  | -1.450508000 | -0.736342000 |
| 4  | 3.352377000  | -0.212043000 | 0.309064000  | 4  | 0.439177000  | -0.033040000 | 0.642269000  |
| 4  | -2.749348000 | 0.644981000  | 0.203706000  | 1  | 0.354830000  | 2.192079000  | -0.926852000 |
| 4  | 1.798960000  | -1.104236000 | -0.439562000 | 4  | -0.935436000 | 1.563670000  | -0.498727000 |
| 4  | -2.430538000 | -1.248599000 | 0.136384000  | 1  | 0.307767000  | -2.227289000 | -0.907528000 |
| 6  | 1.891105000  | 0.450632000  | 0.266240000  | 4  | -0.987072000 | -1.592045000 | -0.506512000 |
| 4  | -1.095269000 | 1.507705000  | -0.376422000 | 4  | -2.554963000 | 1.009691000  | 0.599015000  |
| 1  | 0.741158000  | -2.058862000 | -0.743297000 | 4  | -2.596502000 | -0.989020000 | 0.567468000  |
| 1  | -1.754974000 | -2.415430000 | -0.420967000 | 1  | -2.212950000 | 2.294956000  | -0.082751000 |
| 4  | 1.231595000  | 1.730048000  | -0.443926000 | 1  | -2.300118000 | -2.277267000 | -0.123113000 |
| 1  | 0.012132000  | 2.394357000  | -0.808462000 | 1  | -3.700491000 | 0.029246000  | 0.720111000  |
| 4  | 0.369646000  | 0.159808000  | 0.823661000  | 6  | -1.166316000 | -0.015922000 | 0.170430000  |
| 6  | -1.183786000 | -0.068123000 | 0.285883000  | 6  | 1.927293000  | -0.041278000 | -0.046210000 |
| 4  | -0.563882000 | -1.523168000 | -0.387991000 | 1  | 4.645167000  | 0.136916000  | 1.232544000  |
| 2g |              |              |              | 2h |              |              |              |
| 1  | 1.081714000  | -0.717890000 | 1.978753000  | 4  | 1.915770000  | 1.166389000  | 0.067345000  |
| 1  | -1.738899000 | 2.059562000  | -0.560779000 | 1  | -2.879858000 | -1.790490000 | -0.068011000 |
| 1  | 3.018732000  | 0.882973000  | 1.123837000  | 1  | 3.209307000  | 1.237838000  | -0.752433000 |
| 4  | -0.607574000 | 1.089979000  | -0.414332000 | 4  | -2.730329000 | -0.397158000 | 0.360006000  |
| 4  | 2.124434000  | -0.353364000 | 0.984494000  | 4  | 0.443632000  | 0.204563000  | 1.011117000  |
| 4  | -2.516899000 | 0.899623000  | -0.118325000 | 1  | -3.473338000 | 0.838945000  | 0.126975000  |
| 1  | 2.689388000  | -1.425545000 | 0.131912000  | 4  | 3.189721000  | -0.160382000 | -0.466924000 |
| 1  | -3.835639000 | 0.249658000  | 0.277763000  | 4  | -1.458002000 | -1.634280000 | -0.386003000 |
| 4  | 0.077279000  | -0.288960000 | 1.014370000  | 1  | 2.217274000  | -1.477712000 | 0.956299000  |
| 1  | 0.786298000  | -1.847940000 | -1.471117000 | 1  | -0.267334000 | -2.286361000 | -0.865500000 |
| 6  | -1.412581000 | -0.416598000 | 0.137125000  | 6  | 1.855069000  | -0.602609000 | 0.391749000  |
| 4  | 2.248424000  | 1.407946000  | 0.050485000  | 6  | -1.043307000 | 0.009991000  | 0.050379000  |
| 4  | -2.929558000 | -0.878442000 | 0.493674000  | 4  | -0.202958000 | 1.586677000  | -0.277515000 |
| 4  | 1.830430000  | -0.965313000 | -0.942280000 | 4  | 0.395664000  | -1.001242000 | -0.521228000 |
| 6  | 1.015511000  | 0.475209000  | -0.434498000 | 1  | -1.337266000 | 2.525440000  | -0.461471000 |
| 4  | -0.131331000 | -0.799589000 | -0.992117000 | 4  | -2.138338000 | 1.362444000  | -0.183955000 |
| 2i |              |              |              | 2j |              |              |              |
| 4  | -2.457004000 | -0.914672000 | 1.233354000  | 1  | 3.553505000  | -1.044312000 | 0.572916000  |
| 4  | -3.118954000 | -0.130987000 | -0.348792000 | 1  | -3.683879000 | -1.014209000 | 0.008080000  |
| 4  | 0.005938000  | -1.016431000 | 0.048518000  | 4  | 3.114824000  | -0.309193000 | -0.610133000 |
| 4  | -1.715074000 | 0.969679000  | -1.054160000 | 1  | -2.602867000 | 1.595695000  | 0.542832000  |
| 4  | 0.010521000  | 0.957747000  | -0.058173000 | 4  | 2.109108000  | -0.738622000 | 0.968843000  |
| 1  | -0.558478000 | 1.780017000  | -1.196819000 | 4  | -2.779593000 | 0.183290000  | 0.258069000  |
| 4  | 1.681404000  | 1.003718000  | 1.032311000  | 1  | 1.028843000  | -0.884908000 | 1.921628000  |
| 4  | 2.458175000  | -1.079631000 | -1.116470000 | 4  | -1.189121000 | 1.337345000  | 0.131707000  |
| 4  | 3.133986000  | -0.016319000 | 0.287336000  | 1  | -0.020836000 | 1.330743000  | 1.221245000  |
| 1  | 0.531814000  | 1.831948000  | 1.070327000  | 4  | -2.386730000 | -1.563123000 | -0.354055000 |
| 1  | 3.841288000  | -0.897660000 | -0.713799000 | 4  | 0.179799000  | -0.165112000 | 0.906640000  |
| 1  | 3.149675000  | 1.096213000  | 1.220238000  | 1  | -0.344518000 | 2.227569000  | -0.728649000 |
| 6  | 1.468605000  | -0.254751000 | -0.139189000 | 6  | 1.578283000  | 0.125114000  | -0.438906000 |
| 6  | -1.460797000 | -0.250033000 | 0.147776000  | 6  | -1.237794000 | -0.448930000 | -0.183253000 |
| 1  | -3.173248000 | 0.958142000  | -1.311023000 | 4  | 0.816648000  | 1.599991000  | -0.147604000 |
| 1  | -3.833866000 | -0.832364000 | 0.783855000  | 4  | 0.141772000  | -0.411497000 | -1.104743000 |
| 2k |              |              |              | 2l |              |              |              |
| 4  | 3.193175000  | -0.934167000 | -0.100377000 | 1  | -2.803744000 | 1.286824000  | -0.308940000 |
| 4  | 3.237549000  | 0.901018000  | 0.018860000  | 1  | 3.288944000  | 0.051734000  | 0.469771000  |
| 4  | 0.544797000  | -0.903522000 | 0.310556000  | 4  | -1.593473000 | 1.850403000  | 0.342024000  |
| 4  | 0.547732000  | 0.952339000  | -0.281863000 | 4  | 2.267663000  | 1.012054000  | -0.002852000 |
| 1  | 0.038473000  | -2.291086000 | 0.432462000  | 1  | -0.729286000 | 2.542555000  | -0.584695000 |
| 4  | -1.232375000 | -1.689479000 | 0.175440000  | 1  | 1.688390000  | -2.246724000 | 0.561958000  |
| 1  | 0.066628000  | 2.348169000  | -0.412309000 | 4  | -2.389596000 | -0.019411000 | 0.184768000  |
| 4  | -1.208710000 | 1.775524000  | -0.115727000 | 1  | 1.743497000  | 2.336714000  | 0.235740000  |
| 4  | -2.624140000 | -0.624924000 | -0.566065000 | 1  | -2.069448000 | -2.097447000 | 0.134645000  |
| 4  | -2.553651000 | 0.756656000  | 0.767886000  | 4  | 2.239416000  | -0.943717000 | 0.176430000  |

|    |              |              |              |    |              |              |              |
|----|--------------|--------------|--------------|----|--------------|--------------|--------------|
| 1  | -2.498993000 | -2.070011000 | -0.408136000 | 6  | -1.302736000 | -1.322380000 | -0.004492000 |
| 1  | -2.410758000 | 2.194973000  | 0.569288000  | 4  | 0.392594000  | -1.674002000 | 0.136663000  |
| 1  | -3.676240000 | 0.081078000  | 0.140921000  | 4  | 0.421105000  | 1.721703000  | -0.120037000 |
| 6  | -1.100358000 | 0.043273000  | 0.044962000  | 4  | -0.492504000 | 0.055730000  | 0.866361000  |
| 6  | 1.897452000  | 0.012669000  | -0.011791000 | 4  | -0.446379000 | -0.532979000 | -1.230222000 |
| 1  | 4.387854000  | -0.041653000 | -0.066305000 | 6  | 0.896713000  | 0.022979000  | -0.365790000 |
| 2m |              |              |              | 2n |              |              |              |
| 4  | -0.000573000 | 0.433420000  | 1.039781000  | 1  | -3.598308000 | -0.435787000 | -0.120101000 |
| 1  | -2.720619000 | 1.585857000  | -0.347283000 | 4  | 1.177931000  | 1.655381000  | 0.462420000  |
| 4  | 0.306495000  | -0.917880000 | -0.383861000 | 4  | -2.653037000 | -0.246014000 | -1.168983000 |
| 1  | -0.252419000 | 1.765497000  | -1.458422000 | 1  | 3.164561000  | -1.593718000 | 0.398739000  |
| 4  | 3.140614000  | 0.208047000  | 0.465685000  | 4  | -2.366567000 | -0.264164000 | 0.789374000  |
| 4  | -1.265311000 | 1.283454000  | -0.438507000 | 4  | 3.328232000  | -0.289731000 | -0.209318000 |
| 1  | 1.176534000  | -2.059037000 | -0.887095000 | 1  | 0.573672000  | -1.966871000 | 0.765821000  |
| 4  | 0.767081000  | 1.602216000  | -0.445546000 | 4  | 0.443236000  | 0.196416000  | -1.046180000 |
| 4  | -2.323111000 | -1.619493000 | 0.121994000  | 6  | -1.137655000 | -0.017493000 | -0.652750000 |
| 4  | -2.828690000 | 0.199171000  | 0.080935000  | 6  | 1.897135000  | 0.431901000  | -0.283453000 |
| 6  | -1.234117000 | -0.436263000 | 0.175115000  | 1  | -2.158845000 | 1.044694000  | 1.468106000  |
| 6  | 1.553207000  | 0.246874000  | 0.199597000  | 4  | 1.688693000  | -1.108399000 | 0.433076000  |
| 4  | 2.247337000  | -1.183315000 | -0.477077000 | 4  | -1.127207000 | 1.291692000  | 0.463044000  |
| 1  | -3.663567000 | -1.071716000 | 0.009554000  | 1  | -1.734492000 | -1.441706000 | 1.422276000  |
| 1  | 3.712100000  | -0.995315000 | -0.120960000 | 1  | -0.053924000 | 2.218483000  | 0.914639000  |
| 1  | -0.341934000 | 1.888559000  | 0.702318000  | 4  | -0.677082000 | -1.304732000 | 0.409373000  |
| 2o |              |              |              | 2p |              |              |              |
| 4  | 2.250267000  | -1.336537000 | -0.438693000 | 1  | 0.481232000  | 2.335167000  | -0.375680000 |
| 4  | 3.004222000  | 0.002405000  | 0.690827000  | 1  | 3.069464000  | -1.132661000 | -0.742083000 |
| 4  | -0.086746000 | -1.004880000 | 0.003562000  | 4  | -3.101506000 | 0.582718000  | -0.066798000 |
| 4  | 2.247569000  | 1.334538000  | -0.444934000 | 4  | 2.797985000  | 0.061014000  | 0.076601000  |
| 4  | -0.085352000 | 1.003065000  | 0.004008000  | 1  | -3.321546000 | -0.020489000 | 1.201748000  |
| 4  | -1.959403000 | -1.576611000 | 0.016073000  | 4  | 1.624131000  | -1.371507000 | -0.566376000 |
| 4  | -1.957378000 | 1.577141000  | 0.019249000  | 4  | -0.248852000 | 1.025615000  | -0.256194000 |
| 4  | -3.103533000 | 0.001123000  | 0.044314000  | 4  | 0.038752000  | -0.602466000 | 1.549894000  |
| 1  | -0.654821000 | -2.373130000 | -0.111687000 | 1  | -1.965900000 | 0.213420000  | -1.813299000 |
| 1  | -0.650945000 | 2.372124000  | -0.109361000 | 6  | 1.100524000  | -0.022245000 | 0.408536000  |
| 1  | -3.434970000 | -1.461280000 | -0.052606000 | 6  | -1.677742000 | 0.119682000  | -0.750925000 |
| 1  | -3.432815000 | 1.464502000  | -0.051095000 | 1  | 0.496614000  | -2.028381000 | -1.167576000 |
| 6  | -1.421268000 | -0.000051000 | 0.127795000  | 1  | 3.068630000  | 1.496439000  | -0.106631000 |
| 6  | 1.406066000  | -0.001136000 | -0.089776000 | 4  | -0.363832000 | -1.014446000 | -0.466024000 |
| 1  | 3.511597000  | 1.348837000  | 0.256486000  | 4  | 1.621632000  | 1.610296000  | 0.149539000  |
| 1  | 3.514574000  | -1.344904000 | 0.262527000  | 4  | -1.959606000 | -0.653252000 | 0.843823000  |
| 2q |              |              |              | 2r |              |              |              |
| 1  | -0.207924000 | 2.429475000  | 0.093072000  | 4  | -1.684077000 | -1.435101000 | 0.029626000  |
| 1  | 2.560882000  | -2.322315000 | 0.142648000  | 4  | 2.784998000  | 0.647613000  | -0.041290000 |
| 4  | -1.241742000 | 1.478715000  | 0.074897000  | 6  | -2.014819000 | 0.433616000  | 0.356255000  |
| 4  | 1.220420000  | -1.778344000 | -0.098338000 | 1  | 1.724524000  | -2.509528000 | -0.256210000 |
| 4  | 0.988296000  | 1.568116000  | 0.024846000  | 1  | -2.895365000 | -1.636505000 | -0.910003000 |
| 1  | -0.155112000 | -2.116005000 | -0.126381000 | 4  | -1.130290000 | 1.701995000  | -0.250889000 |
| 4  | 2.758901000  | 0.942408000  | -0.198833000 | 1  | 2.519397000  | 2.056886000  | -0.351257000 |
| 4  | 2.868378000  | -0.899388000 | 0.248896000  | 1  | -2.567797000 | 0.814804000  | 1.236795000  |
| 6  | -1.943310000 | 0.039962000  | 0.003806000  | 4  | -3.128755000 | -0.254144000 | -0.644341000 |
| 4  | -3.210702000 | -0.358851000 | 0.935965000  | 4  | 1.120380000  | 1.588396000  | -0.193065000 |
| 6  | 1.365290000  | -0.067674000 | -0.010515000 | 1  | 3.688190000  | -0.488591000 | -0.252735000 |
| 4  | -3.225513000 | -0.275026000 | -0.940640000 | 1  | -0.011792000 | 2.513627000  | -0.535085000 |
| 4  | -0.314662000 | -0.586622000 | -0.040499000 | 6  | 1.225461000  | -0.050198000 | 0.170792000  |
| 1  | 2.261947000  | 2.306234000  | -0.143502000 | 4  | 0.526532000  | -1.662005000 | -0.062870000 |
| 1  | 3.923035000  | 0.095846000  | 0.053070000  | 4  | 2.437638000  | -1.249722000 | -0.070164000 |
| 1  | -4.351497000 | -0.604595000 | -0.006229000 | 4  | -0.356680000 | -0.099832000 | 0.709547000  |
| 2s |              |              |              | 2t |              |              |              |
| 4  | -1.367386000 | 1.396175000  | -0.287226000 | 1  | -2.255098000 | 1.795444000  | -0.865200000 |
| 4  | -2.860359000 | 0.144755000  | -0.100419000 | 6  | -1.506444000 | -0.153521000 | 0.662343000  |
| 4  | -1.910854000 | -1.392487000 | 0.617768000  | 4  | -2.722054000 | 0.482879000  | -0.445104000 |
| 4  | 0.230212000  | -0.156632000 | -1.195963000 | 4  | -1.155201000 | 1.580827000  | 0.111120000  |

|    |              |              |              |    |              |              |              |
|----|--------------|--------------|--------------|----|--------------|--------------|--------------|
| 4  | 0.906935000  | 1.566158000  | 0.202607000  | 4  | -2.010770000 | -1.355236000 | -0.554049000 |
| 4  | -0.029595000 | -0.785298000 | 0.655322000  | 4  | 0.106677000  | 0.414193000  | 1.101219000  |
| 4  | 2.654280000  | 0.877091000  | 0.641384000  | 1  | -3.052146000 | -0.660998000 | -1.327627000 |
| 4  | 2.448631000  | -1.404920000 | -0.370145000 | 1  | -0.822075000 | -2.067661000 | -0.996960000 |
| 1  | -0.285091000 | 2.349809000  | -0.009937000 | 1  | 3.832595000  | -0.545739000 | -0.418149000 |
| 1  | -0.752334000 | -1.757702000 | 1.487072000  | 6  | 1.390973000  | -0.281521000 | 0.186771000  |
| 1  | 2.166447000  | 2.206689000  | 0.828971000  | 4  | 2.765715000  | 0.530479000  | -0.505075000 |
| 1  | 3.181168000  | -2.476041000 | -0.598274000 | 1  | -1.989449000 | -0.541634000 | 1.580216000  |
| 6  | 1.495612000  | -0.060590000 | -0.039247000 | 4  | 2.706889000  | -1.238817000 | 0.181429000  |
| 6  | -1.252984000 | -0.279824000 | -0.506934000 | 4  | 1.038940000  | 1.441146000  | -0.287651000 |
| 1  | -3.263471000 | -0.879396000 | 0.884163000  | 4  | -0.073420000 | -1.127837000 | -0.092252000 |
| 1  | -2.789943000 | 1.619752000  | 0.031780000  | 1  | 2.360921000  | 1.880633000  | -0.818929000 |
| 2u |              |              |              | 2v |              |              |              |
| 4  | 0.747970000  | 1.400176000  | -0.285792000 | 1  | -0.592743000 | 1.985380000  | 1.067581000  |
| 4  | 2.442360000  | 1.039559000  | 0.633245000  | 1  | 3.425384000  | -1.335261000 | 0.868906000  |
| 4  | 2.986052000  | -0.803573000 | 0.480136000  | 1  | -3.060402000 | 0.767014000  | 1.445530000  |
| 4  | 2.050368000  | -1.334669000 | -1.095641000 | 4  | 3.066724000  | 0.058445000  | 0.704742000  |
| 4  | -0.178307000 | -0.632141000 | 0.135424000  | 4  | -1.692273000 | 1.082183000  | 0.979661000  |
| 4  | -1.564912000 | 1.183166000  | -0.404133000 | 4  | 2.072791000  | -1.468933000 | 0.187742000  |
| 1  | 3.304719000  | -1.840676000 | -0.575141000 | 4  | -0.017942000 | 1.123766000  | -0.052498000 |
| 4  | -2.948974000 | -1.322543000 | 0.661850000  | 6  | 1.643984000  | 0.184623000  | -0.052021000 |
| 4  | -3.265084000 | 0.402669000  | -0.006857000 | 4  | -2.868712000 | -0.374652000 | 0.557371000  |
| 1  | -0.439825000 | 2.052142000  | -0.708209000 | 1  | 0.873091000  | -2.253733000 | 0.116583000  |
| 1  | -2.948061000 | 1.740445000  | -0.485253000 | 6  | -1.308072000 | -0.144526000 | -0.167395000 |
| 1  | -4.227512000 | -0.654476000 | 0.514586000  | 4  | 1.590290000  | 1.350896000  | -1.172316000 |
| 6  | -1.759989000 | -0.381925000 | 0.150413000  | 1  | -3.585376000 | -1.182814000 | -0.504935000 |
| 6  | 1.453153000  | -0.189959000 | -0.106246000 | 4  | 0.222692000  | -0.903390000 | -0.127894000 |
| 1  | 3.687447000  | 0.355625000  | 1.025765000  | 4  | -2.292093000 | -0.983700000 | -1.130935000 |
| 1  | 1.748644000  | 2.277785000  | 0.425144000  | 1  | 0.418512000  | 2.088301000  | -1.288433000 |
| 2w |              |              |              | 2x |              |              |              |
| 1  | -3.161238000 | -1.044816000 | 0.011538000  | 1  | -3.365789000 | 0.511871000  | -0.601727000 |
| 4  | 2.435768000  | 0.493971000  | -0.273862000 | 1  | 2.862380000  | -0.993281000 | 0.673034000  |
| 4  | -2.514894000 | 0.265057000  | -0.057070000 | 4  | -2.489047000 | -0.655936000 | -0.575416000 |
| 1  | 2.544324000  | -1.697961000 | 0.102072000  | 4  | 2.451578000  | -0.263772000 | -1.317794000 |
| 4  | -1.773955000 | -1.528050000 | 0.050084000  | 1  | -2.625232000 | -1.956647000 | 0.086366000  |
| 4  | 0.687413000  | 0.122312000  | 1.049588000  | 6  | 2.100534000  | -0.293687000 | 0.293821000  |
| 1  | -2.653365000 | 1.703578000  | -0.082232000 | 4  | -2.148331000 | 1.201173000  | -0.160681000 |
| 6  | 1.726390000  | -0.974032000 | 0.016386000  | 1  | -0.111617000 | -2.128469000 | 1.238330000  |
| 1  | -0.893754000 | -2.663628000 | 0.078033000  | 1  | -1.576876000 | 2.429935000  | 0.315084000  |
| 4  | 0.681948000  | 0.039216000  | -1.047044000 | 1  | 1.413782000  | 0.193492000  | -2.170251000 |
| 6  | -0.792659000 | -0.064439000 | -0.026805000 | 4  | -0.347681000 | 1.604277000  | 0.489560000  |
| 4  | 0.944709000  | 2.015145000  | 0.011040000  | 4  | 0.497788000  | -0.849044000 | 0.782773000  |
| 4  | -1.161739000 | 1.641562000  | -0.064600000 | 4  | -1.292742000 | -1.621534000 | 0.590207000  |
| 4  | 0.175979000  | -1.634432000 | 0.014892000  | 6  | -0.920087000 | -0.039888000 | -0.059859000 |
| 1  | -0.276878000 | 2.747446000  | -0.208785000 | 4  | 1.739042000  | 1.253890000  | 0.760264000  |
| 1  | 0.937606000  | 1.527079000  | 1.429773000  | 4  | 0.661914000  | 0.331819000  | -0.822863000 |
| 2y |              |              |              | 2z |              |              |              |
| 4  | 2.255266000  | -1.395624000 | 0.884427000  | 1  | -3.233229000 | -0.284510000 | -1.545134000 |
| 4  | 3.011419000  | 0.166249000  | 0.185563000  | 4  | 2.945212000  | 0.053479000  | 0.269033000  |
| 4  | -0.113123000 | -1.093888000 | -0.124399000 | 1  | -1.008106000 | -1.891051000 | -0.794275000 |
| 4  | 1.691436000  | 1.036740000  | -0.909726000 | 4  | 1.785279000  | 1.480291000  | -0.261364000 |
| 4  | -0.032673000 | 0.941358000  | 0.076537000  | 4  | -2.011223000 | -0.867936000 | -0.825645000 |
| 4  | -1.887147000 | -1.656171000 | -0.585020000 | 4  | -0.081233000 | 1.045788000  | 0.032011000  |
| 1  | 0.546254000  | 1.868028000  | -0.990070000 | 4  | -2.950517000 | 0.806988000  | -0.614364000 |
| 4  | -2.960515000 | 0.693049000  | -0.501005000 | 1  | 0.642517000  | 2.344741000  | -0.170600000 |
| 4  | -1.838310000 | 1.186891000  | 0.947638000  | 4  | -0.276193000 | -0.992257000 | 0.239971000  |
| 1  | -0.727836000 | -2.476112000 | -0.569250000 | 1  | 3.218347000  | 1.466274000  | 0.047910000  |
| 1  | -0.602511000 | 1.812078000  | 1.197431000  | 6  | -1.667560000 | 0.427075000  | 0.273547000  |
| 1  | -3.153031000 | 1.770102000  | 0.431109000  | 6  | 1.241607000  | -0.142227000 | -0.055567000 |
| 6  | -1.608125000 | -0.126470000 | -0.168174000 | 1  | 3.516359000  | -1.218769000 | -0.315183000 |
| 6  | 1.338803000  | -0.273940000 | 0.160664000  | 4  | -1.517110000 | -0.325689000 | 1.694630000  |
| 1  | 3.138535000  | 1.297266000  | -0.711015000 | 4  | 2.114818000  | -1.381822000 | -0.606901000 |



|     |              |              |              |     |              |              |              |
|-----|--------------|--------------|--------------|-----|--------------|--------------|--------------|
| 1   | 3.650331000  | -1.019195000 | 0.864642000  | 1   | -0.616300000 | -1.401146000 | 1.759918000  |
| 2ab |              |              |              | 2ac |              |              |              |
| 1   | -3.418649000 | 0.053984000  | -0.103859000 | 1   | -2.666368000 | 1.382447000  | -1.059243000 |
| 1   | 3.020245000  | 1.169230000  | -0.124021000 | 1   | 4.382281000  | 0.004917000  | 0.021036000  |
| 4   | -2.294874000 | -0.931070000 | -0.056231000 | 1   | -2.674925000 | -1.254563000 | -1.199119000 |
| 4   | 1.790846000  | 1.825008000  | -0.536692000 | 4   | 3.202085000  | -0.158063000 | 0.933873000  |
| 4   | -2.339424000 | 1.040217000  | 0.166597000  | 4   | -2.764362000 | 0.027849000  | -0.446106000 |
| 4   | 2.347313000  | -0.038120000 | 0.451900000  | 4   | 0.517241000  | -0.995384000 | 0.020354000  |
| 1   | -1.762527000 | -2.257188000 | -0.388013000 | 1   | -3.502156000 | -0.042011000 | 0.910738000  |
| 1   | 1.595488000  | 0.496664000  | 1.640792000  | 4   | 3.207000000  | 0.156885000  | -0.900944000 |
| 1   | -1.822762000 | 2.413305000  | -0.064522000 | 1   | -0.097812000 | 2.176408000  | -0.580907000 |
| 1   | 2.050644000  | -1.898378000 | -0.626895000 | 1   | -0.108487000 | -2.103096000 | -0.822303000 |
| 6   | -0.923921000 | 0.084078000  | 0.207279000  | 4   | -1.332876000 | 1.447102000  | -0.477714000 |
| 4   | 0.425188000  | 0.127653000  | -0.912981000 | 6   | 1.884145000  | -0.004574000 | 0.018740000  |
| 4   | -0.413570000 | -1.603732000 | -0.227049000 | 4   | -1.341856000 | -1.389290000 | -0.628862000 |
| 6   | 1.270415000  | -1.240329000 | -0.228454000 | 4   | 0.520781000  | 0.984161000  | 0.145727000  |
| 4   | -0.496337000 | 1.723817000  | -0.066818000 | 4   | -2.192073000 | -0.075077000 | 1.447502000  |
| 4   | 0.545507000  | -0.403801000 | 1.129665000  | 6   | -0.983527000 | -0.021566000 | 0.373673000  |
| 2ad |              |              |              | 2ae |              |              |              |
| 4   | 1.276495000  | 1.851180000  | -0.143791000 | 1   | 1.073780000  | 0.894020000  | 1.826613000  |
| 4   | -0.731434000 | -1.628133000 | 0.104362000  | 1   | -3.481159000 | -0.399312000 | 0.207416000  |
| 1   | -2.264910000 | 2.188829000  | -0.549146000 | 4   | 1.347943000  | 1.470182000  | 0.485499000  |
| 1   | -1.984222000 | -2.417437000 | -0.061614000 | 1   | -1.546506000 | -2.364648000 | 0.598106000  |
| 4   | 0.270960000  | 0.361338000  | 0.682272000  | 1   | 0.327022000  | 2.447135000  | 0.130159000  |
| 6   | -1.245493000 | -0.022253000 | 0.185197000  | 4   | -2.247397000 | -1.198963000 | 0.108339000  |
| 4   | -0.903340000 | 1.689671000  | -0.227273000 | 1   | 2.991586000  | 0.544017000  | -0.856524000 |
| 4   | 1.595541000  | -1.325179000 | -0.073906000 | 4   | -2.574612000 | 0.685838000  | -0.175165000 |
| 1   | 0.568754000  | -2.312175000 | 0.055550000  | 4   | 1.428106000  | -0.366486000 | 1.202185000  |
| 6   | 2.031511000  | 0.346710000  | 0.383266000  | 4   | -0.317421000 | -1.568895000 | 0.319550000  |
| 1   | -3.712638000 | -0.218737000 | -0.363230000 | 4   | 0.480805000  | 0.024021000  | -1.015431000 |
| 1   | 2.542642000  | 0.566512000  | 1.339085000  | 6   | -1.009735000 | -0.063021000 | -0.328386000 |
| 4   | -2.585454000 | -1.084524000 | 0.005537000  | 6   | 2.095148000  | 0.098505000  | -0.410526000 |
| 4   | -2.677689000 | 0.828286000  | -0.234183000 | 1   | -2.266936000 | 2.086641000  | 0.116142000  |
| 4   | 3.097664000  | -0.261310000 | -0.715866000 | 4   | 1.845285000  | -1.528115000 | -0.316479000 |
| 1   | 2.687405000  | -1.539741000 | -1.193178000 | 4   | -0.865275000 | 1.627228000  | -0.005608000 |
| 2af |              |              |              | 2ag |              |              |              |
| 1   | 3.502332000  | -0.474101000 | 0.425848000  | 1   | 0.223394000  | -1.968919000 | 1.620380000  |
| 1   | -2.855224000 | -0.849228000 | 1.391392000  | 1   | -1.658940000 | 2.072672000  | 0.959256000  |
| 1   | 1.768685000  | -2.325332000 | -0.724887000 | 4   | 1.347874000  | -1.666379000 | 0.850802000  |
| 1   | 0.322554000  | 2.742252000  | -0.751294000 | 4   | -1.114640000 | 1.529678000  | -0.299898000 |
| 4   | 2.299981000  | -1.211476000 | 0.038510000  | 4   | 2.849877000  | 0.395011000  | -0.185764000 |
| 4   | -0.552749000 | -0.143184000 | 0.793062000  | 1   | 0.117297000  | 2.243267000  | -0.664890000 |
| 4   | 2.520623000  | 0.608596000  | 0.600245000  | 4   | -0.306229000 | -0.555003000 | 1.098393000  |
| 4   | 1.068527000  | 1.606809000  | -0.234499000 | 4   | -1.890812000 | 0.652003000  | 1.261458000  |
| 1   | 2.428915000  | 2.007870000  | 0.253165000  | 6   | 1.393482000  | -0.308336000 | -0.017002000 |
| 4   | -2.389368000 | 0.965114000  | -0.053957000 | 6   | -1.501892000 | -0.146305000 | -0.189422000 |
| 4   | 0.543074000  | -1.474471000 | -0.760315000 | 1   | 2.690366000  | 1.785440000  | -0.496708000 |
| 6   | -2.166052000 | -0.535636000 | 0.599884000  | 4   | 1.203554000  | 1.356758000  | -0.387373000 |
| 1   | -0.662019000 | -2.114321000 | -1.306737000 | 4   | -1.846935000 | -1.107870000 | -1.428015000 |
| 4   | -1.102760000 | 2.442397000  | -0.691350000 | 4   | -0.031024000 | -0.621796000 | -0.986501000 |
| 6   | 0.992168000  | -0.067943000 | 0.124520000  | 1   | -0.658366000 | -1.524203000 | -2.115896000 |
| 4   | -1.753232000 | -1.630986000 | -0.512656000 | 1   | -0.909949000 | 0.189974000  | 2.243997000  |
| 3a  |              |              |              | 3b  |              |              |              |

|    |              |              |              |    |              |              |              |
|----|--------------|--------------|--------------|----|--------------|--------------|--------------|
| 1  | -4.241171000 | -1.861149000 | 1.362483000  | 4  | -1.235523000 | -0.777641000 | 0.000000000  |
| 1  | -0.624337000 | 1.899739000  | 0.000000000  | 4  | -1.596800000 | 1.095945000  | 0.000000000  |
| 1  | -1.639359000 | -1.684456000 | 2.274627000  | 4  | -3.934409000 | 1.168349000  | 0.000000000  |
| 4  | 0.685215000  | 1.146993000  | 0.000000000  | 4  | -4.490058000 | -0.600474000 | 0.000000000  |
| 4  | -2.857220000 | -1.364972000 | 1.543177000  | 4  | -2.952988000 | -1.745714000 | 0.000000000  |
| 1  | 3.253973000  | -1.067393000 | 0.000000000  | 4  | 1.225288000  | -0.762194000 | 0.000000000  |
| 4  | -4.032698000 | -1.342091000 | 0.000000000  | 4  | -0.009825000 | 2.127784000  | 0.000000000  |
| 4  | 1.916445000  | -0.384281000 | 0.000000000  | 1  | -1.414032000 | 2.579506000  | 0.000000000  |
| 4  | -0.952021000 | -1.220763000 | 1.026170000  | 4  | 1.605524000  | 1.104721000  | 0.000000000  |
| 6  | 0.227521000  | -0.528156000 | 0.000000000  | 1  | -1.584350000 | -2.231582000 | 0.000000000  |
| 1  | -4.241171000 | -1.861149000 | -1.362483000 | 4  | 2.880024000  | -1.784143000 | 0.000000000  |
| 4  | -1.168560000 | 0.519401000  | 0.000000000  | 4  | 4.485114000  | -0.753259000 | 0.000000000  |
| 6  | -2.421467000 | -0.743438000 | 0.000000000  | 4  | 4.030935000  | 1.069170000  | 0.000000000  |
| 4  | -2.857220000 | -1.364972000 | -1.543177000 | 1  | 1.518531000  | -2.239805000 | 0.000000000  |
| 4  | -0.952021000 | -1.220763000 | -1.026170000 | 1  | 1.384568000  | 2.587595000  | 0.000000000  |
| 1  | -1.639359000 | -1.684456000 | -2.274627000 | 1  | 4.298851000  | -2.197607000 | 0.000000000  |
| 6  | 2.411851000  | 1.373718000  | 0.000000000  | 1  | 5.360880000  | 0.490844000  | 0.000000000  |
| 4  | 2.257437000  | 2.973544000  | 0.000000000  | 6  | 2.896155000  | -0.076373000 | 0.000000000  |
| 4  | 3.935104000  | 2.181466000  | 0.000000000  | 6  | 0.000000000  | 0.422628000  | 0.000000000  |
| 4  | 3.738321000  | 0.282408000  | 0.000000000  | 6  | -2.880605000 | -0.040403000 | 0.000000000  |
| 1  | 3.537914000  | 3.641002000  | 0.000000000  | 1  | -5.297072000 | 0.690877000  | 0.000000000  |
| 1  | 4.940383000  | 1.132059000  | 0.000000000  | 1  | -4.389804000 | -2.085116000 | 0.000000000  |
| 3c |              |              |              | 3d |              |              |              |
| 4  | -0.637257000 | -1.204152000 | 0.213637000  | 4  | 2.372306000  | -0.387130000 | -0.819533000 |
| 4  | -2.075103000 | -0.124285000 | 1.193238000  | 1  | -0.403722000 | 1.634173000  | 1.793615000  |
| 4  | -2.805133000 | -1.384393000 | -0.171051000 | 4  | 0.368828000  | 0.051424000  | -0.849307000 |
| 4  | -1.851570000 | 1.073978000  | -0.318791000 | 4  | -0.577457000 | -1.616527000 | -0.439877000 |
| 4  | -4.156714000 | -0.440973000 | -1.140915000 | 6  | -1.342971000 | -0.017590000 | -0.549510000 |
| 4  | -0.033014000 | 1.853192000  | -0.122539000 | 4  | 0.269858000  | 1.948693000  | 0.498497000  |
| 1  | -1.221116000 | 2.287424000  | -0.886559000 | 1  | -3.802534000 | -0.075153000 | 0.044859000  |
| 4  | 1.034042000  | 0.170495000  | 0.888504000  | 4  | 0.454498000  | 0.475380000  | 1.778497000  |
| 1  | 0.391367000  | -2.191924000 | -0.150227000 | 1  | -2.190625000 | -0.887183000 | 1.981603000  |
| 4  | 1.724396000  | -1.629362000 | -0.156948000 | 1  | -0.526690000 | 2.703206000  | -0.450720000 |
| 1  | 1.228831000  | 2.417845000  | -0.580056000 | 6  | 1.545918000  | 0.780263000  | 0.414378000  |
| 4  | 2.310837000  | 1.482596000  | -0.399255000 | 4  | -1.458960000 | 1.654198000  | -0.829210000 |
| 4  | 3.653964000  | -1.345012000 | -0.112198000 | 4  | 1.245563000  | -1.049186000 | 0.795375000  |
| 4  | 4.006045000  | 0.526697000  | -0.295061000 | 1  | -2.837456000 | 1.860030000  | -1.299123000 |
| 1  | 2.884793000  | -2.556495000 | -0.341247000 | 1  | 3.720382000  | 0.378127000  | -0.901471000 |
| 1  | 3.710851000  | 1.885691000  | -0.729372000 | 4  | -2.936464000 | 0.426095000  | -1.020508000 |
| 1  | 4.872355000  | -0.636313000 | -0.536919000 | 1  | -1.045798000 | -2.428379000 | 0.684028000  |
| 6  | 2.490251000  | -0.123290000 | 0.155600000  | 4  | -0.845611000 | -1.319294000 | 1.629880000  |
| 6  | -0.548165000 | 0.457382000  | 0.692746000  | 4  | 3.050935000  | 1.225916000  | 0.028218000  |
| 6  | -3.399345000 | 0.274402000  | 0.115238000  | 6  | 1.154245000  | -1.513658000 | -0.879704000 |
| 1  | -4.135492000 | 0.973890000  | 0.537493000  | 4  | -2.513227000 | -0.463434000 | 0.641074000  |
| 1  | -3.670008000 | -1.746210000 | -1.409095000 | 1  | 1.222209000  | -2.463454000 | -1.416197000 |
| 3e |              |              |              | 3f |              |              |              |
| 1  | -3.795714000 | -0.072851000 | 0.073814000  | 4  | 0.534614000  | -1.772605000 | -0.203929000 |
| 1  | 3.696624000  | 0.434871000  | -0.926549000 | 4  | 2.746455000  | -1.487775000 | -0.133234000 |
| 4  | -2.946481000 | 0.424988000  | -1.009406000 | 4  | 1.151923000  | 0.394455000  | 0.062394000  |
| 4  | 3.025205000  | 1.259325000  | 0.025653000  | 4  | 2.486485000  | 1.823820000  | 0.130452000  |
| 1  | -2.853324000 | 1.866789000  | -1.287255000 | 4  | 4.281783000  | 1.229133000  | 0.142382000  |
| 4  | 2.375078000  | -0.361905000 | -0.827230000 | 4  | 4.432699000  | -0.647778000 | 0.023733000  |
| 1  | -2.168539000 | -0.917457000 | 1.978322000  | 4  | -1.649853000 | -0.481059000 | 0.920159000  |
| 6  | 1.536715000  | 0.778848000  | 0.433359000  | 1  | 3.746344000  | 2.582104000  | 0.213611000  |
| 6  | -1.345605000 | -0.018744000 | -0.569631000 | 1  | 1.723887000  | -2.529856000 | -0.272082000 |
| 4  | 0.470818000  | 0.423231000  | 1.813814000  | 4  | -4.077987000 | 0.251233000  | 1.544518000  |
| 4  | -2.486824000 | -0.450663000 | 0.648218000  | 1  | 1.089904000  | 1.961988000  | 0.143014000  |
| 4  | 0.248732000  | 1.935324000  | 0.538222000  | 4  | -1.642655000 | 0.108932000  | -0.894747000 |
| 4  | -0.572505000 | -1.605697000 | -0.460135000 | 4  | -4.824970000 | -0.073927000 | -0.132716000 |
| 1  | -0.558555000 | 2.711016000  | -0.413990000 | 4  | -3.491786000 | 0.642179000  | -1.309936000 |
| 1  | -1.010957000 | -2.457475000 | 0.658789000  | 1  | -5.478767000 | 0.150845000  | 1.211750000  |
| 1  | 1.225241000  | -2.430772000 | -1.467826000 | 1  | -2.295953000 | 0.672651000  | -2.112234000 |

|    |              |              |              |    |              |              |              |
|----|--------------|--------------|--------------|----|--------------|--------------|--------------|
| 4  | -1.468953000 | 1.655853000  | -0.832268000 | 1  | -4.943861000 | 0.474469000  | -1.474468000 |
| 6  | 1.163484000  | -1.494865000 | -0.904643000 | 6  | -3.138957000 | 0.025426000  | 0.256811000  |
| 4  | -0.821955000 | -1.364495000 | 1.633520000  | 6  | -0.322941000 | -0.463123000 | -0.012788000 |
| 4  | 0.363986000  | 0.067330000  | -0.854352000 | 6  | 2.923597000  | 0.173622000  | 0.040575000  |
| 1  | -0.422233000 | 1.572426000  | 1.836641000  | 1  | 5.472190000  | 0.378780000  | 0.114694000  |
| 4  | 1.252874000  | -1.057786000 | 0.772351000  | 1  | 4.129240000  | -2.052972000 | -0.128176000 |
| 3g |              |              |              | 3h |              |              |              |
| 4  | -0.118685000 | -1.863085000 | -0.059782000 | 4  | 1.004013000  | -0.605323000 | 0.000000000  |
| 4  | 0.876869000  | -0.378616000 | -0.906156000 | 4  | -1.343233000 | -2.522114000 | 0.000000000  |
| 4  | 2.140645000  | -1.680734000 | -0.107747000 | 4  | -1.081767000 | -0.528771000 | 0.000000000  |
| 4  | 0.840334000  | 0.322549000  | 0.900917000  | 4  | -3.234713000 | 0.235192000  | 0.000000000  |
| 4  | 1.842128000  | 1.828341000  | 0.088835000  | 4  | -4.283042000 | -1.374458000 | 0.000000000  |
| 4  | 3.686265000  | 1.189652000  | -0.143704000 | 4  | -3.203702000 | -2.934580000 | 0.000000000  |
| 4  | 3.853317000  | -0.740992000 | 0.090248000  | 4  | -1.319852000 | 1.580315000  | 0.000000000  |
| 4  | -1.983319000 | -1.264645000 | 0.214023000  | 1  | -4.701928000 | 0.019666000  | 0.000000000  |
| 4  | -0.420531000 | 1.616511000  | 0.105666000  | 4  | 1.405257000  | 1.595091000  | 0.000000000  |
| 1  | 3.148737000  | 2.536954000  | -0.088101000 | 1  | 0.023505000  | -1.964124000 | 0.000000000  |
| 4  | -2.155949000 | 0.697559000  | -0.099968000 | 4  | 3.206860000  | 0.054239000  | 0.000000000  |
| 1  | -1.362196000 | -2.604051000 | 0.182361000  | 1  | -2.752017000 | 1.642899000  | 0.000000000  |
| 1  | -1.784848000 | 2.130661000  | -0.068122000 | 4  | 3.948051000  | 3.003283000  | 0.000000000  |
| 4  | -4.647238000 | 0.849714000  | -0.202078000 | 4  | 4.661098000  | 1.279540000  | 0.000000000  |
| 1  | -3.975795000 | -0.651975000 | 1.063685000  | 1  | 2.329433000  | -1.121824000 | 0.000000000  |
| 1  | -5.415622000 | 1.893570000  | -0.446457000 | 1  | 4.680944000  | -0.180434000 | 0.000000000  |
| 1  | -3.960491000 | -1.054117000 | -0.689284000 | 1  | 5.353270000  | 2.631479000  | 0.000000000  |
| 6  | -3.518905000 | -0.403182000 | 0.087717000  | 6  | 3.023567000  | 1.708368000  | 0.000000000  |
| 6  | -0.610437000 | -0.152328000 | 0.015968000  | 6  | 0.000000000  | 0.705470000  | 0.000000000  |
| 6  | 2.341595000  | 0.102908000  | -0.021438000 | 6  | -2.571202000 | -1.338809000 | 0.000000000  |
| 1  | 4.873667000  | 0.319701000  | -0.029859000 | 1  | -4.659228000 | -2.792585000 | 0.000000000  |
| 1  | 3.547685000  | -2.160150000 | 0.061275000  | 1  | -2.024047000 | -3.814913000 | 0.000000000  |
| 3i |              |              |              | 3j |              |              |              |
| 4  | 1.163439000  | 0.819615000  | 0.148753000  | 4  | 0.045379000  | -1.672255000 | 0.136581000  |
| 4  | 2.772290000  | 1.877508000  | -0.251933000 | 4  | -1.826653000 | -1.077891000 | 0.338938000  |
| 4  | 1.733816000  | -1.097197000 | 0.223507000  | 4  | -2.042961000 | 0.654830000  | -0.576660000 |
| 4  | 3.662597000  | -1.137010000 | -0.154397000 | 4  | -3.947390000 | 1.156631000  | -0.332100000 |
| 4  | 4.287031000  | 0.677268000  | -0.450419000 | 4  | -4.756788000 | -0.253693000 | 0.689136000  |
| 4  | -0.440676000 | -2.002748000 | 0.803156000  | 4  | 1.096570000  | -0.173148000 | -0.579074000 |
| 1  | 2.686667000  | -2.262511000 | 0.077755000  | 4  | 0.138249000  | 1.392823000  | 0.456320000  |
| 4  | -1.201868000 | 0.356392000  | 0.911451000  | 1  | -2.799651000 | 1.997256000  | -0.533069000 |
| 1  | 1.347220000  | 2.311366000  | -0.079944000 | 1  | -1.182288000 | -2.384660000 | 0.500870000  |
| 4  | -3.751571000 | 0.696148000  | 1.428197000  | 4  | 2.287039000  | -1.616328000 | -0.028501000 |
| 1  | -1.574155000 | -2.480322000 | 0.128531000  | 4  | 2.357833000  | 1.658665000  | 0.172753000  |
| 4  | -1.535957000 | -1.008902000 | -0.486042000 | 4  | 4.104599000  | -0.909526000 | -0.128395000 |
| 4  | -4.254021000 | 0.835975000  | -0.367200000 | 4  | 4.146018000  | 1.009725000  | -0.044510000 |
| 4  | -2.871234000 | 0.087166000  | -1.465283000 | 1  | 3.620319000  | -2.273722000 | 0.057369000  |
| 1  | -5.000165000 | 1.202823000  | 0.898954000  | 1  | 1.123870000  | 2.395389000  | 0.629489000  |
| 1  | -1.916400000 | -0.860517000 | -1.936581000 | 1  | 5.234496000  | 0.027528000  | 0.059687000  |
| 1  | -4.238881000 | 0.557748000  | -1.791862000 | 1  | 3.671511000  | 2.354216000  | 0.311738000  |
| 6  | -2.741497000 | 0.279607000  | 0.244644000  | 6  | 2.733832000  | 0.082565000  | -0.248233000 |
| 6  | 0.070727000  | -0.537279000 | 0.439271000  | 6  | -0.539222000 | 0.036125000  | -0.088459000 |
| 6  | 2.736627000  | 0.234741000  | -0.027599000 | 6  | -3.403813000 | -0.491386000 | -0.192317000 |
| 1  | 5.013952000  | -0.634991000 | -0.536135000 | 1  | -5.178009000 | 1.135854000  | 0.590693000  |
| 1  | 4.186815000  | 2.166151000  | -0.626734000 | 1  | -3.629532000 | -1.302330000 | -0.907482000 |
| 3k |              |              |              | 3l |              |              |              |
| 4  | -1.118577000 | 2.679842000  | -0.652362000 | 4  | -1.343620000 | -0.387461000 | 1.373102000  |
| 4  | 1.192346000  | 1.455239000  | 0.227549000  | 1  | -2.903055000 | 2.398433000  | -0.515628000 |
| 4  | 3.054769000  | 1.215296000  | 0.788264000  | 1  | 1.811941000  | -1.799304000 | -1.480515000 |
| 4  | 0.722741000  | -0.047336000 | -0.860423000 | 1  | -0.415847000 | 1.839036000  | -0.092365000 |
| 4  | 2.248209000  | -1.660977000 | -0.185038000 | 4  | 0.987772000  | -2.037978000 | -0.310358000 |
| 4  | 3.692899000  | -0.565832000 | 0.450251000  | 4  | 0.443805000  | 0.604899000  | -0.022782000 |
| 4  | -2.007341000 | 1.191500000  | 0.166311000  | 1  | 4.180884000  | -0.695354000 | -0.804779000 |
| 4  | 0.061931000  | -2.143659000 | -0.605554000 | 1  | 2.345712000  | -1.886329000 | 0.614273000  |
| 1  | 1.319322000  | -2.787601000 | -0.392734000 | 4  | -1.591837000 | -1.049920000 | -0.399202000 |

|    |              |              |              |    |              |              |              |
|----|--------------|--------------|--------------|----|--------------|--------------|--------------|
| 4  | -1.208676000 | -0.203082000 | -0.959234000 | 1  | -4.362056000 | 0.363664000  | -1.324791000 |
| 1  | 2.155327000  | 2.369121000  | 0.927361000  | 6  | -2.631208000 | 0.118833000  | 0.472316000  |
| 4  | -1.969465000 | -1.900816000 | -0.037410000 | 1  | 4.075949000  | 2.126585000  | -0.556955000 |
| 4  | -3.394528000 | -0.521128000 | 1.512907000  | 1  | -2.556717000 | -1.647758000 | -1.354174000 |
| 1  | -2.426947000 | 2.670176000  | -0.069980000 | 4  | 2.702178000  | 2.109215000  | -0.100594000 |
| 1  | -1.001202000 | -2.951564000 | 0.105185000  | 4  | 3.838499000  | 0.632267000  | -0.326096000 |
| 1  | -3.674580000 | -0.396699000 | -0.623598000 | 4  | -1.825250000 | 1.547154000  | 0.062883000  |
| 1  | -3.744034000 | -0.600078000 | 2.784218000  | 4  | 2.732004000  | -0.975338000 | -0.590766000 |
| 6  | -2.737423000 | -0.409624000 | -0.035716000 | 4  | -3.705032000 | 1.180191000  | -0.280685000 |
| 6  | -0.380297000 | 1.259539000  | -0.540064000 | 4  | -3.504588000 | -0.679658000 | -0.738077000 |
| 6  | 2.166114000  | 0.005630000  | -0.005039000 | 4  | 1.513681000  | -0.680736000 | 1.067705000  |
| 1  | 3.650191000  | -2.007649000 | 0.231804000  | 6  | 2.191345000  | 0.616301000  | 0.148330000  |
| 1  | 4.334319000  | 0.574838000  | 1.141604000  | 6  | -0.088012000 | -1.026720000 | 0.475088000  |
| 3m |              |              |              | 3n |              |              |              |
| 1  | -1.264254000 | -3.023115000 | -0.486571000 | 4  | 2.080489000  | 1.693817000  | -0.021095000 |
| 1  | -1.152660000 | 3.062759000  | -1.041577000 | 1  | -3.555282000 | 2.323890000  | -0.246029000 |
| 6  | -0.651972000 | -2.166050000 | -0.210484000 | 4  | -3.526760000 | -1.006095000 | -0.367207000 |
| 4  | -2.154782000 | 2.144004000  | -0.568229000 | 6  | 0.021963000  | -1.478220000 | 0.541695000  |
| 1  | 2.235408000  | -2.045429000 | -1.483010000 | 1  | 5.599472000  | 1.169132000  | -0.487486000 |
| 1  | -3.580196000 | 1.827513000  | -0.343338000 | 4  | -1.660107000 | -1.468774000 | -0.051141000 |
| 4  | -1.798502000 | -1.003209000 | 0.439338000  | 6  | 2.799393000  | 0.254645000  | -0.076746000 |
| 4  | 3.503794000  | 2.298531000  | 1.061552000  | 1  | 1.268693000  | 2.881057000  | -0.094850000 |
| 4  | 1.036344000  | -2.053842000 | -0.594886000 | 1  | -1.117095000 | 2.861435000  | 0.050495000  |
| 4  | -0.206342000 | 1.960348000  | -0.607682000 | 4  | 3.007332000  | -1.277037000 | -0.397834000 |
| 1  | -3.271895000 | -0.788236000 | 0.555878000  | 4  | -0.753670000 | 0.118190000  | 0.605937000  |
| 4  | 0.015960000  | 0.365017000  | 1.131755000  | 1  | 0.040802000  | -1.941338000 | 1.549692000  |
| 4  | -0.271823000 | -0.521371000 | -0.716085000 | 4  | 1.232852000  | -0.140301000 | 0.439417000  |
| 6  | -1.287356000 | 0.769752000  | -0.000906000 | 1  | -4.740061000 | -0.211693000 | -0.631822000 |
| 4  | 0.218148000  | -1.594876000 | 1.192545000  | 4  | 4.357897000  | 0.772896000  | -0.272071000 |
| 4  | -2.997270000 | 0.583099000  | 0.196006000  | 1  | 2.478552000  | -2.613688000 | -0.644644000 |
| 1  | -0.473880000 | -0.663687000 | 2.132465000  | 1  | -2.856945000 | -2.304742000 | -0.407000000 |
| 1  | 1.193466000  | 2.175461000  | -0.687006000 | 4  | -2.155573000 | 1.818177000  | 0.008965000  |
| 4  | 2.454070000  | -0.736589000 | -0.882056000 | 6  | -2.324686000 | 0.141938000  | 0.011318000  |
| 4  | 2.053650000  | 1.070197000  | -0.114290000 | 4  | 0.075123000  | 2.099168000  | 0.255239000  |
| 1  | 3.024433000  | 0.557605000  | -1.181245000 | 4  | -3.816257000 | 0.894802000  | -0.298415000 |
| 6  | 1.252092000  | -0.461720000 | 0.275145000  | 4  | 1.120220000  | -2.388587000 | -0.210623000 |
| 4a |              |              |              | 4b |              |              |              |
| 4  | -0.030912000 | 0.949150000  | 0.000000000  | 1  | -3.018147000 | 2.313694000  | -0.908418000 |
| 4  | -1.847384000 | 1.543851000  | 0.000000000  | 1  | 1.412194000  | -0.799266000 | -1.739807000 |
| 4  | 0.030912000  | -0.949150000 | 0.000000000  | 1  | -0.420121000 | 3.058548000  | -0.606368000 |
| 4  | -2.324163000 | -1.545199000 | 0.000000000  | 4  | 2.296855000  | -0.323020000 | -0.624479000 |
| 4  | -3.159435000 | 0.175382000  | 0.000000000  | 4  | -1.555095000 | 2.204380000  | -0.930797000 |
| 4  | 2.324163000  | 1.545199000  | 0.000000000  | 1  | 3.851310000  | 1.015899000  | 2.084595000  |
| 4  | 1.847384000  | -1.543851000 | 0.000000000  | 4  | -2.900322000 | 0.843054000  | -0.568392000 |
| 1  | 0.638956000  | -2.327096000 | 0.000000000  | 4  | 2.862716000  | 0.592613000  | 1.018097000  |
| 4  | -3.689433000 | -2.930558000 | 0.000000000  | 4  | 0.144977000  | 1.768477000  | -0.092390000 |
| 4  | -5.487618000 | -0.451808000 | 0.000000000  | 6  | 1.290634000  | 0.601187000  | 0.420182000  |
| 4  | -5.487618000 | -2.303921000 | 0.000000000  | 6  | -3.841038000 | -0.355373000 | 0.222359000  |
| 1  | -2.260171000 | -3.060206000 | 0.000000000  | 4  | 0.395257000  | -0.032352000 | -0.947203000 |
| 1  | -6.641237000 | -1.321669000 | 0.000000000  | 6  | -1.181825000 | 0.608830000  | -0.517073000 |
| 1  | -4.966224000 | -3.665321000 | 0.000000000  | 4  | -2.029068000 | -0.735777000 | 0.369281000  |
| 4  | 3.159435000  | -0.175382000 | 0.000000000  | 4  | -0.267159000 | 0.094677000  | 0.976774000  |
| 1  | -0.638956000 | 2.327096000  | 0.000000000  | 1  | -1.161503000 | -0.822461000 | 1.628650000  |
| 1  | -3.313656000 | 1.650012000  | 0.000000000  | 6  | 3.958552000  | -0.386651000 | -0.080376000 |
| 4  | 3.689433000  | 2.930558000  | 0.000000000  | 4  | 4.376408000  | -1.265267000 | -1.351058000 |
| 1  | 3.313656000  | -1.650012000 | 0.000000000  | 4  | 5.618615000  | -0.802959000 | -0.054942000 |
| 4  | 5.487618000  | 2.303921000  | 0.000000000  | 4  | 4.763816000  | 0.267273000  | 1.275705000  |
| 4  | 5.487618000  | 0.451808000  | 0.000000000  | 1  | 5.778186000  | -1.617155000 | -1.327114000 |
| 1  | 2.260171000  | 3.060206000  | 0.000000000  | 1  | 6.164462000  | -0.181897000 | 1.142368000  |
| 1  | 4.966224000  | 3.665321000  | 0.000000000  | 4  | -3.500775000 | -1.993334000 | -0.107425000 |
| 1  | 6.641237000  | 1.321669000  | 0.000000000  | 4  | -5.248157000 | -1.311282000 | 0.300929000  |
| 6  | 4.118505000  | 1.283127000  | 0.000000000  | 4  | -5.132350000 | 0.543359000  | 0.485101000  |

|    |              |              |              |    |              |              |              |
|----|--------------|--------------|--------------|----|--------------|--------------|--------------|
| 6  | 1.457624000  | 0.093046000  | 0.000000000  | 1  | -4.816195000 | -2.681630000 | 0.064899000  |
| 6  | -1.457624000 | -0.093046000 | 0.000000000  | 1  | -6.337647000 | -0.263271000 | 0.510303000  |
| 6  | -4.118505000 | -1.283127000 | 0.000000000  | 1  | -2.113357000 | -2.229786000 | -0.116457000 |
| 4c |              |              |              | 4d |              |              |              |
| 4  | -1.569850000 | 2.525241000  | 0.390542000  | 4  | 0.580628000  | 2.278788000  | 0.808431000  |
| 4  | -0.031638000 | 1.874037000  | -0.549094000 | 4  | 0.810407000  | -0.097139000 | 0.547394000  |
| 4  | 2.029492000  | 2.573635000  | 0.616525000  | 4  | -0.810407000 | 0.097139000  | -0.547394000 |
| 4  | 0.063709000  | 0.379618000  | 0.737772000  | 4  | -0.580628000 | -2.278788000 | -0.808431000 |
| 4  | 1.910023000  | -0.327087000 | 0.662085000  | 4  | 1.287656000  | -1.544868000 | -2.296105000 |
| 4  | 2.876531000  | 0.636026000  | -0.748379000 | 4  | 2.125290000  | -0.553611000 | -0.839435000 |
| 4  | -3.191788000 | 0.865539000  | 0.219642000  | 4  | -1.287656000 | 1.544868000  | 2.296105000  |
| 1  | 0.712986000  | -0.884326000 | 1.309236000  | 1  | -1.505531000 | -3.228176000 | -0.731425000 |
| 4  | 3.390010000  | -2.162568000 | 1.035806000  | 4  | 2.646751000  | -2.018265000 | -3.601376000 |
| 4  | 4.588824000  | -0.241026000 | -1.028094000 | 4  | 4.372356000  | -0.472319000 | -1.596052000 |
| 4  | 4.893695000  | -1.820861000 | 0.000338000  | 4  | 4.388858000  | -1.316326000 | -3.251722000 |
| 1  | 4.600464000  | -2.949196000 | 0.977362000  | 1  | 1.246722000  | -2.345046000 | -3.581105000 |
| 1  | 4.049436000  | 0.925325000  | -1.658135000 | 1  | 5.514424000  | -0.660874000 | -2.465294000 |
| 1  | 5.742337000  | -1.161785000 | -0.975896000 | 1  | 3.899810000  | -2.107842000 | -4.372072000 |
| 4  | -2.009373000 | -0.648674000 | -0.276008000 | 4  | -2.125290000 | 0.553611000  | 0.839435000  |
| 1  | -0.534157000 | 3.337353000  | -0.120803000 | 1  | 1.505531000  | 3.228176000  | 0.731425000  |
| 1  | 2.523494000  | 3.689977000  | 1.132031000  | 1  | 2.324590000  | 0.148990000  | 0.420080000  |
| 4  | -5.050155000 | 0.224628000  | 0.101085000  | 4  | -2.646751000 | 2.018265000  | 3.601376000  |
| 1  | -1.699515000 | -2.116884000 | -0.634222000 | 1  | -2.324590000 | -0.148990000 | -0.420080000 |
| 4  | -5.034077000 | -1.664739000 | -0.343664000 | 4  | -4.372356000 | 0.472319000  | 1.596052000  |
| 4  | -3.182278000 | -2.212131000 | -0.565895000 | 4  | -4.388858000 | 1.316326000  | 3.251722000  |
| 1  | -4.505418000 | 1.597036000  | 0.424143000  | 1  | -1.246722000 | 2.345046000  | 3.581105000  |
| 1  | -6.184787000 | -0.734541000 | -0.069064000 | 1  | -5.514424000 | 0.660874000  | 2.465294000  |
| 1  | -4.441613000 | -3.000878000 | -0.699045000 | 1  | -3.899810000 | 2.107842000  | 4.372072000  |
| 6  | -3.700438000 | -0.691828000 | -0.172224000 | 6  | -3.036495000 | 1.096240000  | 2.223746000  |
| 6  | -1.431220000 | 0.959381000  | 0.126822000  | 6  | -0.454354000 | 1.009909000  | 0.921402000  |
| 6  | 1.435858000  | 1.178532000  | -0.048816000 | 6  | 0.454354000  | -1.009909000 | -0.921402000 |
| 6  | 3.462670000  | -0.874857000 | 0.086936000  | 6  | 3.036495000  | -1.096240000 | -2.223746000 |
| 4e |              |              |              |    |              |              |              |
| 4  | -0.128160000 | -0.290654000 | -0.405008000 |    |              |              |              |
| 4  | 0.063260000  | -1.977724000 | 0.563085000  |    |              |              |              |
| 4  | 1.574097000  | -2.572064000 | -0.421514000 |    |              |              |              |
| 4  | 3.016550000  | -0.720025000 | -0.755641000 |    |              |              |              |
| 4  | 2.093220000  | 0.454391000  | 0.565925000  |    |              |              |              |
| 4  | -1.827629000 | 0.615402000  | 0.141839000  |    |              |              |              |
| 4  | -2.283246000 | -2.098041000 | 1.377416000  |    |              |              |              |
| 1  | 0.550339000  | -3.421412000 | 0.059611000  |    |              |              |              |
| 4  | 4.845932000  | -0.011239000 | -0.967607000 |    |              |              |              |
| 4  | 3.343968000  | 1.914829000  | 0.995653000  |    |              |              |              |
| 4  | 4.994513000  | 1.656025000  | 0.012088000  |    |              |              |              |
| 1  | 4.243042000  | -1.282497000 | -1.479986000 |    |              |              |              |
| 1  | 4.601537000  | 2.726022000  | 0.990219000  |    |              |              |              |
| 1  | 6.012697000  | 0.907640000  | -0.809333000 |    |              |              |              |
| 4  | -3.096128000 | -0.969130000 | 0.098159000  |    |              |              |              |
| 1  | -0.671392000 | 1.004909000  | -0.742217000 |    |              |              |              |
| 1  | 1.990266000  | 1.646867000  | 1.535000000  |    |              |              |              |
| 4  | -3.300715000 | 1.822268000  | 0.726538000  |    |              |              |              |
| 1  | -3.675023000 | -2.059141000 | 1.129192000  |    |              |              |              |
| 4  | -4.824984000 | 1.804637000  | -0.433230000 |    |              |              |              |
| 4  | -4.716650000 | 0.310605000  | -1.539879000 |    |              |              |              |
| 1  | -1.973850000 | 1.768171000  | 1.188430000  |    |              |              |              |
| 1  | -4.402629000 | 2.820535000  | 0.513238000  |    |              |              |              |
| 1  | -5.749753000 | 1.328000000  | -1.551420000 |    |              |              |              |
| 6  | -3.631398000 | 0.578967000  | -0.402504000 |    |              |              |              |
| 6  | -1.403877000 | -1.129936000 | 0.481215000  |    |              |              |              |
| 6  | 1.411714000  | -1.027524000 | -0.085610000 |    |              |              |              |
| 6  | 3.633336000  | 0.712459000  | -0.103771000 |    |              |              |              |
